# Supplementary material for: Tyrosine Is Associated with Insulin Resistance in Longitudinal Metabolomic Profiling of Obese Children
Source: J Diabetes Res. 2015 Dec 21;2016:2108909. doi: 10.1155/2016/2108909 (PMC4736430; doi:10.1155/2016/2108909)
Supplement: Supplementary file 1 — The supplementary material contains the estimates, 95% confidence intervals (95%CI), and p-values (p) of the estimate for the associations of all metabolites to all clinical parameters. The first table depicts the associations at baseline, the second one the associations in the changes from baseline to the end of the intervention, and the third table contains the associations at the end of the intervention. Each association is calculated for the whole cohort (_all) and stratified for children with (_WL) and without (_nWL) substantial weight loss during the intervention. Estimates, CIs, and p-values were calculated with robust regression models. [file 2108909.f1.xlsx]

## Sheet: S1_Obeldicks_associations_start
Analyte	ClinicalParameter	Estimate_all	P_all	95%CI_all	Estimate_WL	P_WL	95%CI_WL	Estimate_nWL	P_nWL	95%CI_nWL	P WL vs. nWL (rlm)
Tyr	Homa	0.044	0.00447727	0.015; 0.074	0.052	0.0471185	0.00064; 0.1	0.027	0.167776	-0.011; 0.064	0.425
Trp	Homa	0.09	0.00655828	0.026; 0.15	0.092	0.0721155	-0.0087; 0.19	0.074	0.0668607	-0.0076; 0.16	0.772
AAA sum	Homa	0.025	0.0126396	0.0059; 0.045	0.03	0.0666251	-0.0021; 0.063	0.016	0.162071	-0.0066; 0.038	0.459
ratio Carn C5:1/Carn C5	Homa	-11.42	0.0144416	-21; -2.3	-10.809	0.216389	-28; 6.8	-9.663	0.0295008	-18; -1.6	0.905
Orn	Homa	0.043	0.0256614	0.0062; 0.08	0.049	0.100557	-0.01; 0.11	0.02	0.473009	-0.03; 0.07	0.446
ratio Carn C5/Carn C6-oxo	HbA1C	-2.252	0.0279721	-4.2; -0.34	-2.876	0.015404	-5.1; -0.6	0.22	0.905661	-3.2; 3.7	0.133
Carn C6-OH	Glucose	-521.798	0.0341952	-992; -52	-593.965	0.0472073	-1177; -11	-634.613	0.0935471	-1350; 81	0.929
Carn C3-OH	Homa	-20.655	0.0357163	-40; -1.3	-15.235	0.469006	-59; 28	-18.532	0.0626485	-37; 0.44	0.888
Thr	Homa	0.024	0.0357976	0.0019; 0.047	0.004	0.831839	-0.036; 0.044	0.043	0.000479959	0.02; 0.067	0.0916
Carn C4:1	2 hour OGTT Glucose	-2051.45	0.0406199	-4018; -85	-2847.01	0.0913048	-6187; 493	-1234.25	0.392719	-4124; 1655	0.462
ratio Carn C6-oxo/xLeu	Homa	-17256	0.0436795	-33969; -543	-33990	0.0112179	-59574; -8406	-2816.98	0.806105	-25161; 19527	0.0672
Ser	2 hour OGTT Glucose	-0.367	0.044571	-0.73; -0.0089	-0.478	0.0430381	-0.94; -0.016	-0.193	0.532081	-0.81; 0.43	0.458
ratio Carn C5/Carn C6-oxo	Homa	0.162	0.0535376	0.00056; 0.32	0.178	0.130394	-0.055; 0.41	0.161	0.156287	-0.046; 0.37	0.917
Carn C6-OH	Homa	-145.757	0.062079	-302; 10	-209.287	0.0612414	-431; 12	-51.149	0.630649	-271; 169	0.309
Carn C4:1	Homa	-184.051	0.0661055	-383; 15	-245.958	0.198238	-632; 140	-129.57	0.278241	-363; 104	0.603
Carn C6:1-DC	Homa	-5.627	0.07711	-12; 0.65	-10.734	0.0596016	-22; 0.48	-1.417	0.701624	-9; 6.2	0.168
xLeu	Homa	0.016	0.0797712	-0.0019; 0.034	0.013	0.38755	-0.018; 0.044	0.022	0.0782469	-0.0024; 0.047	0.649
Carn C5:1	Homa	-88.627	0.0806829	-190; 13	-90.63	0.309293	-273; 92	-91.529	0.104974	-206; 22	0.993
BCAA sum	Homa	0.009	0.0812087	-0.0011; 0.018	0.007	0.403238	-0.0095; 0.023	0.013	0.0843575	-0.0016; 0.027	0.579
Arg	2 hour OGTT Glucose	0.319	0.0842835	-0.04; 0.68	-0.118	0.680405	-0.69; 0.45	0.677	0.00925617	0.18; 1.2	0.0375
Carn C4-OH	Homa	-25.364	0.0873261	-55; 4	-17.678	0.453141	-66; 31	-21.95	0.195923	-55; 11	0.883
Carn C4	HbA1C	65.299	0.0884489	-11; 142	44.323	0.521092	-94; 183	55.362	0.224187	-37; 148	0.894
Val	Homa	0.017	0.0899932	-0.0028; 0.037	0.012	0.464221	-0.021; 0.045	0.027	0.0821408	-0.0025; 0.056	0.508
AAA sum	Waist	0.089	0.092651	-0.016; 0.19	0.073	0.451217	-0.12; 0.27	0.015	0.828571	-0.13; 0.16	0.625
ratio Carn C4-OH/Carn C4:1	2 hour OGTT Glucose	3.371	0.0934281	-0.56; 7.3	2.186	0.461988	-3.8; 8.1	4.597	0.121017	-1.2; 10	0.56
ratio Carn C4:1/Carn C4	Glucose	62.272	0.094173	-11; 136	53.442	0.345963	-60; 167	63.005	0.137416	-22; 148	0.892
Met	HbA1C	1.314	0.0988569	-0.23; 2.9	-1.141	0.318822	-3.4; 1.1	2.416	0.029658	0.23; 4.6	0.0246
Trp	Glucose	0.173	0.10102	-0.028; 0.37	0.101	0.450377	-0.17; 0.37	0.274	0.112058	-0.057; 0.6	0.414
Arg	HbA1C	0.394	0.105324	-0.086; 0.87	0.154	0.627079	-0.48; 0.79	0.51	0.170308	-0.23; 1.2	0.462
Carn C5:1	HbA1C	1072.83	0.105392	-225; 2371	1421.08	0.163729	-595; 3437	308.74	0.735879	-1565; 2182	0.416
Trp	Waist	0.304	0.108107	-0.071; 0.68	0.211	0.413173	-0.3; 0.73	0.18	0.462073	-0.32; 0.68	0.932
Met	Glucose	0.259	0.135038	-0.081; 0.6	0.171	0.509234	-0.35; 0.69	0.471	0.0476924	0.0033; 0.94	0.39
Pro	Homa	0.011	0.140689	-0.004; 0.026	0.002	0.871956	-0.026; 0.03	0.017	0.0322883	0.0011; 0.034	0.345
Phe	Glucose	0.17	0.143927	-0.057; 0.4	0.252	0.205775	-0.14; 0.65	0.254	0.110627	-0.06; 0.57	0.994
xLeu	Waist	0.073	0.146294	-0.026; 0.17	0.074	0.325808	-0.077; 0.22	0.041	0.496511	-0.082; 0.17	0.736
Carn C5	Homa	12.771	0.147466	-4.5; 30	8.405	0.527602	-18; 35	18.063	0.104537	-4.1; 40	0.573
Val	Waist	0.079	0.15362	-0.031; 0.19	0.04	0.636484	-0.13; 0.21	0.071	0.323652	-0.074; 0.22	0.781
BCAA sum	Waist	0.039	0.154252	-0.015; 0.094	0.031	0.454871	-0.052; 0.11	0.03	0.379399	-0.039; 0.1	0.992
Arg	Glucose	0.08	0.156151	-0.032; 0.19	0.01	0.895613	-0.15; 0.17	0.177	0.0179471	0.032; 0.32	0.12
Carn C3:1	HbA1C	3036.67	0.162749	-1248; 7321	951.764	0.75667	-5218; 7121	5286.27	0.119005	-1501; 12073	0.342
ratio Carn C5/Carn C6-oxo	Glucose	0.331	0.163397	-0.13; 0.79	0.374	0.182686	-0.18; 0.93	0.385	0.38272	-0.44; 1.2	0.982
Carn C2	HbA1C	-2.284	0.163445	-5.5; 0.97	-0.181	0.935604	-4.6; 4.2	-3.761	0.138502	-8.8; 1.3	0.285
Carn C5-OH	Glucose	-179.788	0.164099	-430; 70	16.641	0.937028	-408; 441	-369.535	0.0214134	-674; -65	0.139
ratio Carn C5/xLeu	2 hour OGTT Glucose	-27882.2	0.169071	-67798; 12034	-23177.8	0.345598	-72053; 25698	-52287.4	0.15876	-126209; 21634	0.508
Arg	Waist	0.141	0.176622	-0.067; 0.35	0.149	0.350005	-0.17; 0.47	0.148	0.232845	-0.1; 0.4	0.997
Carn C5-oxo	2 hour OGTT Glucose	160.061	0.184842	-78; 398	74.752	0.734827	-370; 520	221.41	0.149564	-84; 527	0.584
Pro	Glucose	0.031	0.186762	-0.014; 0.075	0.026	0.472599	-0.047; 0.099	0.044	0.137987	-0.012; 0.1	0.696
Tyr	Waist	0.108	0.190143	-0.055; 0.27	0.087	0.592451	-0.24; 0.41	0.03	0.756236	-0.17; 0.23	0.764
Orn	Glucose	-0.077	0.191002	-0.19; 0.038	-0.073	0.374224	-0.24; 0.091	-0.018	0.831782	-0.18; 0.15	0.635
Carn C6-OH	2 hour OGTT Glucose	-1052.76	0.19184	-2647; 541	-744.013	0.466873	-2794; 1306	-1460.77	0.273224	-4123; 1202	0.667
BCAA sum	2 hour OGTT Glucose	0.061	0.195462	-0.032; 0.16	-0.002	0.98277	-0.15; 0.15	0.111	0.132363	-0.036; 0.26	0.28
Val	2 hour OGTT Glucose	0.124	0.198223	-0.067; 0.32	0.009	0.951465	-0.29; 0.31	0.215	0.150256	-0.083; 0.51	0.326
Carn C6-oxo	Homa	-48.962	0.198786	-124; 26	-145.312	0.0225077	-268; -23	9.917	0.82356	-78; 98	0.041
ratio Carn C5:1/Carn C5	HbA1C	70.453	0.204872	-42; 183	97.915	0.240665	-70; 266	56.186	0.438561	-94; 206	0.709
ratio Carn C4:1/Carn C4	2 hour OGTT Glucose	-160.055	0.204926	-411; 91	-476.428	0.0110982	-839; -114	24.769	0.886495	-326; 376	0.0479
xLeu	2 hour OGTT Glucose	0.108	0.217489	-0.064; 0.28	-0.021	0.876779	-0.29; 0.25	0.191	0.148564	-0.073; 0.45	0.262
Gln	Glucose	0.012	0.231464	-0.0079; 0.032	-0.005	0.769928	-0.038; 0.029	0.025	0.0411979	0.00065; 0.049	0.151
ratio Carn C4/Val	HbA1C	11392.2	0.235282	-7352; 30137	14864	0.310393	-14381; 44109	9668.38	0.43865	-15534; 34871	0.786
AAA sum	HbA1C	0.153	0.243001	-0.1; 0.41	-0.164	0.443576	-0.59; 0.26	0.318	0.14095	-0.1; 0.74	0.107
Carn C3-OH	Glucose	33.105	0.246099	-24; 90	9.185	0.871889	-105; 124	50.883	0.141997	-18; 120	0.531
Carn C4:1	Glucose	335.764	0.247214	-239; 911	32.007	0.949309	-982; 1046	492.677	0.195349	-258; 1244	0.462
Orn	2 hour OGTT Glucose	-0.21	0.250263	-0.57; 0.15	-0.347	0.207029	-0.89; 0.2	-0.214	0.475461	-0.82; 0.39	0.741
Carn C5-oxo	Waist	77.209	0.254776	-57; 211	54.517	0.660262	-195; 304	44.675	0.542711	-103; 192	0.945
ratio Carn C5-OH/Carn C5:1	HbA1C	-10.039	0.261781	-27; 7.2	-10.051	0.525701	-41; 21	-7.638	0.463177	-29; 13	0.896
ratio Carn C5-oxo/Carn C5-OH	Glucose	0.898	0.264896	-0.7; 2.5	-0.747	0.688639	-4.4; 2.9	1.149	0.226601	-0.7; 3	0.354
Carn C3	Waist	22.43	0.277511	-18; 63	-14.579	0.646309	-78; 49	38.425	0.102038	-8.9; 86	0.181
AAA sum	Glucose	0.033	0.27944	-0.027; 0.094	0.041	0.391523	-0.054; 0.14	0.053	0.19854	-0.028; 0.13	0.845
Carn C6-oxo	Glucose	-121.942	0.279752	-345; 101	-201.231	0.249665	-551; 149	-81.087	0.584064	-379; 217	0.598
Gly	Glucose	0.022	0.282411	-0.019; 0.064	0.011	0.686086	-0.043; 0.065	0.036	0.186037	-0.019; 0.092	0.509
ratio Carn C4-OH/Carn C4:1	HbA1C	-2.546	0.300772	-7.4; 2.3	-4.77	0.167625	-12; 2.1	-1.217	0.721338	-8.1; 5.7	0.462
Carn C2	Homa	-0.133	0.312513	-0.39; 0.12	-0.207	0.333563	-0.63; 0.21	-0.179	0.325489	-0.55; 0.19	0.923
Pro	HbA1C	0.104	0.319082	-0.1; 0.31	0.023	0.89047	-0.31; 0.36	0.045	0.740606	-0.23; 0.32	0.916
ratio Carn C6-oxo/xLeu	2 hour OGTT Glucose	-83705.9	0.320941	-251455; 84044	-71673.2	0.546054	-310293; 166947	-24092.8	0.856503	-293265; 245080	0.79
Trp	HbA1C	0.431	0.329731	-0.42; 1.3	-0.635	0.270496	-1.8; 0.51	1.504	0.0571923	-0.0085; 3	0.0252
Carn C5-oxo	Homa	-11.505	0.333845	-35; 12	-10.748	0.63735	-57; 36	-10.311	0.400607	-36; 15	0.987
Trp	2 hour OGTT Glucose	0.31	0.346979	-0.34; 0.96	-0.441	0.313587	-1.3; 0.44	0.895	0.0923022	-0.15; 1.9	0.0516
ratio Carn C5-OH/Carn C5:1	Glucose	-1.8	0.347178	-5.6; 2	2.318	0.547226	-5.4; 10	-4.008	0.0686186	-8.3; 0.29	0.152
His	Waist	0.115	0.349929	-0.13; 0.36	0.139	0.387799	-0.18; 0.46	0.096	0.536542	-0.22; 0.41	0.849
Gly	HbA1C	0.089	0.351662	-0.089; 0.27	-0.039	0.768654	-0.28; 0.2	0.078	0.552794	-0.19; 0.35	0.515
Carn C6-OH	Waist	-436.74	0.360018	-1382; 509	-538.696	0.378898	-1759; 682	-222.026	0.722483	-1487; 1043	0.717
Phe	HbA1C	0.494	0.36014	-0.57; 1.6	-0.895	0.290317	-2.6; 0.82	1.064	0.186613	-0.53; 2.7	0.0941
Ser	HbA1C	0.224	0.36348	-0.26; 0.71	0.075	0.806451	-0.53; 0.68	0.359	0.38464	-0.47; 1.2	0.577
ratio Carn C5/Carn C6-oxo	Waist	-0.395	0.368328	-1.3; 0.47	-0.576	0.296127	-1.7; 0.52	0.806	0.215125	-0.46; 2.1	0.0991
Carn C6-oxo	HbA1C	438.099	0.376372	-531; 1407	641.189	0.386092	-795; 2078	68.323	0.920946	-1308; 1445	0.562
BCAA sum	Glucose	-0.013	0.378707	-0.041; 0.015	-0.025	0.267189	-0.07; 0.02	-0.001	0.974798	-0.042; 0.041	0.421
Carn C2	Glucose	-0.357	0.38003	-1.2; 0.45	-0.568	0.285998	-1.6; 0.5	-0.382	0.544092	-1.6; 0.89	0.821
Arg	Homa	0.017	0.383785	-0.021; 0.054	0.036	0.233449	-0.024; 0.095	0.01	0.691312	-0.039; 0.059	0.498
ratio Carn C5-oxo/Carn C5-OH	2 hour OGTT Glucose	2.46	0.388329	-3.2; 8.1	4.599	0.471394	-8.2; 17	2.351	0.48476	-4.4; 9.1	0.755
ratio Carn C4-OH/Carn C4:1	Homa	-0.164	0.391907	-0.54; 0.22	-0.018	0.955885	-0.67; 0.63	-0.205	0.35836	-0.64; 0.23	0.629
Gln	HbA1C	0.042	0.392797	-0.054; 0.14	-0.018	0.827319	-0.18; 0.14	0.055	0.394984	-0.076; 0.19	0.476
ratio Carn C4:1/Carn C4	Homa	-10.854	0.394851	-36; 15	-22.491	0.333889	-69; 24	4.507	0.739155	-24; 33	0.321
ratio Carn C5:1/Carn C5	Glucose	11.155	0.396265	-15; 37	-12.073	0.578012	-56; 32	21.633	0.155539	-9.2; 53	0.206
ratio Carn C5-oxo/Carn C5-OH	Waist	1.327	0.397912	-1.8; 4.4	0.623	0.862472	-6.6; 7.9	0.503	0.747844	-2.7; 3.7	0.976
xLeu	Glucose	-0.022	0.400246	-0.073; 0.03	-0.047	0.238521	-0.13; 0.032	0.004	0.9228	-0.069; 0.076	0.345
ratio Carn C6-oxo/xLeu	Glucose	-20627.8	0.40444	-69824; 28568	-27059.2	0.435915	-96765; 42647	-19252.3	0.580883	-89785; 51281	0.874
Carn C4-OH	HbA1C	-157.297	0.404862	-531; 216	-415.599	0.110474	-932; 100	7.245	0.978201	-524; 538	0.252
ratio Carn C4/Val	Homa	-613.428	0.407237	-2064; 837	1650.74	0.241844	-1054; 4355	-1607.22	0.0333033	-3143; -71	0.0373
Val	Glucose	-0.024	0.409345	-0.082; 0.033	-0.036	0.43488	-0.13; 0.056	-0.005	0.907757	-0.091; 0.081	0.624
Phe	Waist	0.184	0.411157	-0.26; 0.63	0.249	0.514886	-0.52; 1	-0.113	0.679538	-0.66; 0.43	0.439
Carn C5:1	Glucose	118.984	0.412968	-169; 407	-106.292	0.674133	-615; 402	259.09	0.159411	-111; 629	0.244
Thr	Waist	0.052	0.414847	-0.074; 0.18	0.008	0.939737	-0.2; 0.21	0.067	0.342886	-0.076; 0.21	0.63
His	Glucose	0.047	0.42802	-0.071; 0.16	0.019	0.808828	-0.14; 0.18	0.101	0.224483	-0.067; 0.27	0.475
ratio Carn C4/Carn C5-oxo	HbA1C	2.365	0.431683	-3.6; 8.4	2.806	0.628853	-8.9; 15	1.931	0.585764	-5.3; 9.1	0.898
Orn	Waist	0.082	0.433489	-0.13; 0.29	0.091	0.565922	-0.23; 0.41	-0.145	0.330642	-0.44; 0.15	0.278
ratio Carn C4/Carn C5-oxo	2 hour OGTT Glucose	-1.875	0.437247	-6.7; 2.9	10.405	0.0230158	1.5; 19	-5.149	0.0778465	-11; 0.6	0.00411
Carn C4	Waist	13.387	0.444919	-21; 48	31.466	0.343527	-35; 98	1.61	0.929754	-36; 39	0.43
Gly	Homa	0.005	0.454846	-0.0085; 0.019	0.008	0.398421	-0.012; 0.029	0.001	0.879712	-0.015; 0.017	0.574
ratio Carn C5-OH/Carn C5:1	Waist	-2.818	0.465252	-11; 4.9	3.915	0.580341	-10; 18	-2.897	0.46822	-11; 5.2	0.402
Carn C5:1	Waist	209.318	0.474416	-374; 793	-295.309	0.543103	-1269; 679	272.764	0.427271	-424; 970	0.34
Carn C3:1	Glucose	330.077	0.47534	-589; 1249	-275.127	0.696756	-1695; 1145	1026.63	0.0765825	-135; 2188	0.155
Carn C3:1	Homa	-112.337	0.475425	-430; 205	-30.519	0.908914	-578; 517	-123.883	0.557166	-561; 313	0.788
ratio Carn C5-oxo/Carn C5-OH	HbA1C	2.684	0.483187	-4.8; 10	-19.302	0.0173591	-34; -4.8	3.434	0.397334	-4.8; 12	0.00736
Tyr	HbA1C	0.136	0.48903	-0.25; 0.53	-0.061	0.865706	-0.78; 0.66	0.211	0.447399	-0.34; 0.76	0.546
His	2 hour OGTT Glucose	-0.147	0.493163	-0.57; 0.28	-0.563	0.0404729	-1.1; -0.025	0.432	0.193944	-0.22; 1.1	0.0201
Gln	Waist	0.013	0.514735	-0.027; 0.053	-0.014	0.684391	-0.08; 0.053	0.013	0.554633	-0.033; 0.059	0.504
Ser	Waist	0.068	0.518255	-0.14; 0.28	0.041	0.773076	-0.24; 0.32	0.06	0.671037	-0.23; 0.35	0.922
Carn C6:1-DC	Waist	11.678	0.522868	-25; 48	7.93	0.782692	-50; 66	0.024	0.999077	-41; 41	0.822
ratio Carn C6:1-DC/Carn C5:1	Homa	-0.055	0.524437	-0.23; 0.12	-0.282	0.0567245	-0.57; 0.0072	0.077	0.421201	-0.12; 0.27	0.0406
Carn C6:1-DC	HbA1C	26.784	0.524962	-57; 111	3.036	0.963164	-128; 134	17.06	0.754632	-94; 128	0.869
Carn C5	Waist	31.433	0.530109	-66; 129	-48.692	0.458611	-180; 82	92.192	0.172977	-44; 228	0.136
Gly	2 hour OGTT Glucose	-0.043	0.539126	-0.18; 0.095	-0.095	0.320549	-0.29; 0.096	0.003	0.974634	-0.2; 0.21	0.48
Carn C6-oxo	2 hour OGTT Glucose	-234.086	0.542905	1000; 531	-346.591	0.547891	-1504; 811	131.88	0.815337	-1007; 1271	0.553
Carn C3	Glucose	-6.798	0.54433	-29; 15	-17.437	0.283231	-50; 15	0.161	0.991556	-30; 30	0.422
Pro	Waist	0.026	0.546949	-0.06; 0.11	-0.003	0.971267	-0.15; 0.14	0.009	0.864446	-0.094; 0.11	0.898
Carn C6-OH	HbA1C	-610.703	0.570512	-2690; 1469	638.786	0.604641	-1802; 3080	-2910.76	0.0984028	-6393; 571	0.0953
ratio Carn C5-OH/Carn C5:1	Homa	0.381	0.570699	-0.97; 1.7	-0.3	0.832285	-3.2; 2.6	0.741	0.311111	-0.7; 2.2	0.516
ratio Carn C5/xLeu	HbA1C	-13988.8	0.58827	-65347; 37369	-1269.36	0.965056	-60797; 58258	-38759.7	0.437257	-137131; 59612	0.511
Gln	Homa	-0.002	0.589688	-0.0086; 0.0049	0	0.939225	-0.014; 0.013	-0.003	0.401734	-0.011; 0.0042	0.713
His	HbA1C	0.146	0.591267	-0.38; 0.67	-0.122	0.725882	-0.82; 0.57	0.306	0.432826	-0.49; 1.1	0.415
Carn C5-OH	Waist	140.496	0.591516	-378; 659	155.799	0.711433	-690; 1002	2.428	0.993431	-595; 600	0.765
Carn C3	Homa	1.869	0.593497	-5.1; 8.8	-1.026	0.864939	-13; 11	4.739	0.226616	-3; 13	0.43
Carn C2	2 hour OGTT Glucose	0.697	0.601644	-2; 3.3	0.151	0.935843	-3.6; 3.9	2.331	0.268464	-1.9; 6.5	0.438
Carn C3:1	Waist	483.406	0.601855	-1359; 2325	-244.899	0.861858	-3073; 2583	762.506	0.491427	-1509; 3034	0.576
Carn C0	HbA1C	0.313	0.608429	-0.9; 1.5	-0.444	0.591682	-2.1; 1.2	1.148	0.257983	-0.84; 3.1	0.219
ratio Carn C6-oxo/xLeu	HbA1C	57821.4	0.611612	-166161; 281804	182027	0.230882	-111584; 475638	-22513.7	0.888461	-347718; 302690	0.348
Met	2 hour OGTT Glucose	-0.312	0.614533	-1.5; 0.92	-1.352	0.136614	-3.2; 0.45	0.399	0.673449	-1.5; 2.3	0.18
ratio Carn C4-OH/Carn C4:1	Glucose	-0.301	0.616848	-1.5; 0.88	-0.53	0.528211	-2.2; 1.2	0.354	0.652661	-1.2; 1.9	0.44
Carn C5-oxo	HbA1C	77.418	0.618779	-232; 387	-152.474	0.57201	-692; 388	59.287	0.749539	-319; 438	0.518
Carn C3:1	2 hour OGTT Glucose	-808.067	0.62307	-4082; 2466	-496.731	0.843936	-5581; 4588	-892.611	0.714409	-5829; 4043	0.91
Met	Waist	0.166	0.625187	-0.51; 0.84	0.077	0.883098	-0.98; 1.1	-0.135	0.767138	-1; 0.76	0.758
Thr	HbA1C	0.074	0.632408	-0.22; 0.37	-0.244	0.248938	-0.66; 0.18	0.349	0.0920369	-0.06; 0.76	0.0441
ratio Carn C4/Carn C5-oxo	Waist	-0.638	0.633127	-3.3; 2	2.504	0.364675	-3; 8	-2.123	0.10199	-4.7; 0.45	0.128
Pro	2 hour OGTT Glucose	0.037	0.638063	-0.12; 0.19	-0.01	0.940305	-0.27; 0.25	0.04	0.712628	-0.18; 0.26	0.769
Carn C4-OH	Glucose	19.918	0.638677	-64; 104	-19.211	0.770054	-152; 113	65.253	0.244166	-47; 178	0.329
Ser	Homa	0.008	0.642282	-0.028; 0.044	0.005	0.854623	-0.049; 0.059	0.013	0.538993	-0.031; 0.056	0.824
Carn C0	Homa	0.021	0.65408	-0.071; 0.11	0.005	0.936628	-0.14; 0.15	0.031	0.621846	-0.096; 0.16	0.785
Tyr	Glucose	0.018	0.67441	-0.067; 0.1	0.037	0.642847	-0.12; 0.2	0.027	0.673752	-0.1; 0.16	0.925
xLeu	HbA1C	0.047	0.685576	-0.18; 0.28	-0.163	0.336091	-0.51; 0.18	0.094	0.612161	-0.27; 0.46	0.301
Carn C5-OH	Homa	-19.159	0.686543	-111; 73	-98.421	0.259052	-271; 74	11.35	0.826818	-90; 112	0.27
Carn C3-OH	HbA1C	57.337	0.689776	-227; 342	-172.098	0.481379	-666; 322	107.894	0.53363	-241; 457	0.352
ratio Carn C4/Carn C5-oxo	Glucose	-0.267	0.711297	-1.7; 1.2	0.124	0.927142	-2.6; 2.9	-0.404	0.601512	-2; 1.2	0.736
Carn C5	Glucose	-9.599	0.716537	-62; 43	-7.164	0.829377	-74; 60	-3.827	0.921479	-82; 74	0.948
Carn C4:1	HbA1C	502.657	0.717635	-2216; 3222	-15.039	0.99466	-4611; 4580	680.062	0.721516	-3011; 4371	0.812
ratio Carn C5:1/Carn C5	2 hour OGTT Glucose	16.55	0.720218	-75; 108	-18.233	0.814984	-174; 137	68.595	0.25041	-51; 188	0.374
ratio Carn C6-oxo/xLeu	Waist	-17874.2	0.722082	-117610; 81862	-18860.7	0.780903	-155123; 117402	-42094.2	0.510276	-169564; 85375	0.802
ratio Carn C5/xLeu	Waist	-4228.95	0.723163	-27833; 19375	-15593.9	0.281271	-44317; 13129	25217.8	0.137925	-8862; 59298	0.0678
Carn C5-oxo	Glucose	11.932	0.728035	-57; 81	-55.514	0.399535	-188; 77	24.827	0.532789	-56; 106	0.298
Carn C4:1	Waist	-207.769	0.729033	-1389; 974	-414.736	0.68092	-2441; 1611	85.152	0.902272	-1322; 1492	0.683
Carn C4	2 hour OGTT Glucose	10.723	0.729593	-51; 72	114.325	0.0493505	-0.38; 229	-15.277	0.689343	-92; 62	0.0615
Carn C5	2 hour OGTT Glucose	-30.373	0.730698	-205; 144	-77.572	0.485899	-301; 146	-60.828	0.673461	-352; 231	0.927
AAA sum	2 hour OGTT Glucose	0.034	0.73264	-0.16; 0.23	-0.184	0.263458	-0.51; 0.14	0.131	0.348007	-0.15; 0.41	0.143
BCAA sum	HbA1C	0.022	0.732649	-0.1; 0.15	-0.112	0.221536	-0.3; 0.073	0.11	0.30495	-0.1; 0.32	0.112
ratio Carn C4/Val	Glucose	-737.457	0.734798	-5105; 3630	-2365.49	0.511653	-9616; 4885	-918.988	0.738377	-6538; 4700	0.751
ratio Carn C6:1-DC/Carn C5:1	Waist	0.16	0.739945	-0.8; 1.1	0.364	0.613683	-1.1; 1.8	-0.291	0.615242	-1.4; 0.86	0.476
Ser	Glucose	-0.018	0.740251	-0.12; 0.089	-0.021	0.773844	-0.17; 0.13	0.04	0.613508	-0.12; 0.2	0.573
ratio Carn C6:1-DC/Carn C5:1	2 hour OGTT Glucose	0.286	0.742325	-1.4; 2	-0.49	0.708367	-3.1; 2.1	1.171	0.344304	-1.3; 3.6	0.355
Gly	Waist	0.013	0.745588	-0.064; 0.09	0.028	0.595108	-0.076; 0.13	0	0.994384	-0.097; 0.097	0.693
ratio Carn C5-OH/Carn C5:1	2 hour OGTT Glucose	2.096	0.75714	-11; 16	3.472	0.792296	-23; 30	-0.779	0.928351	-18; 17	0.788
Thr	2 hour OGTT Glucose	0.035	0.758304	-0.19; 0.26	-0.22	0.205748	-0.57; 0.13	0.251	0.0816774	-0.035; 0.54	0.037
ratio Carn C5/xLeu	Homa	626.553	0.764934	-3563; 4816	113.716	0.967359	-5467; 5694	2473.62	0.404737	-3649; 8597	0.566
His	Homa	-0.006	0.766991	-0.047; 0.035	0.034	0.2829	-0.029; 0.097	-0.043	0.107695	-0.094; 0.0089	0.061
Carn C6-oxo	Waist	63.59	0.768877	-366; 493	19.722	0.952588	-648; 687	-98.869	0.718181	-644; 446	0.781
Tyr	2 hour OGTT Glucose	0.044	0.770272	-0.25; 0.34	-0.265	0.324034	-0.8; 0.27	0.125	0.546223	-0.29; 0.54	0.248
Thr	Glucose	0.01	0.78218	-0.058; 0.077	-0.027	0.590894	-0.13; 0.074	0.061	0.179589	-0.028; 0.15	0.19
Val	HbA1C	0.036	0.783334	-0.21; 0.28	-0.253	0.148444	-0.6; 0.097	0.283	0.180494	-0.13; 0.7	0.0496
Carn C4	Glucose	-2.46	0.790909	-21; 16	-10.01	0.558735	-44; 24	-3.008	0.764525	-24; 18	0.725
Carn C5-OH	2 hour OGTT Glucose	120.051	0.794764	-797; 1037	-394.329	0.600494	-1911; 1122	258.67	0.674887	-985; 1502	0.503
ratio Carn C6:1-DC/Carn C5:1	Glucose	-0.058	0.813227	-0.55; 0.43	-0.11	0.764034	-0.84; 0.63	-0.057	0.86055	-0.71; 0.6	0.913
Orn	HbA1C	-0.055	0.817374	-0.53; 0.42	-0.331	0.332489	-1; 0.36	0.028	0.940312	-0.72; 0.77	0.479
Carn C3-OH	Waist	-13.393	0.819034	-130; 103	-75.514	0.505953	-303; 152	22.773	0.714741	-105; 151	0.449
Carn C5:1	2 hour OGTT Glucose	-117.667	0.821045	-1154; 919	-708.073	0.411893	-2441; 1025	405.561	0.584885	-1092; 1903	0.328
Carn C5-OH	HbA1C	-124.437	0.834762	-1275; 1026	633.531	0.526542	-1330; 2597	-1045.41	0.16857	-2531; 440	0.172
Carn C6:1-DC	Glucose	1.872	0.836062	-16; 20	-6.96	0.639797	-37; 23	6.903	0.555214	-17; 31	0.466
Carn C0	2 hour OGTT Glucose	0.096	0.839764	-0.85; 1	-0.371	0.570373	-1.7; 0.94	0.667	0.369612	-0.82; 2.2	0.294
Carn C5	HbA1C	-22.188	0.840972	-242; 198	-41.389	0.75506	-312; 229	-133.058	0.461196	-495; 229	0.683
Carn C4-OH	Waist	-15.36	0.856218	-184; 153	-5.382	0.967421	-270; 260	18.552	0.855344	-189; 226	0.886
Carn C4	Homa	-0.486	0.874375	-6.6; 5.6	13.65	0.0313128	1.2; 26	-3.76	0.204721	-10; 2.5	0.0137
ratio Carn C6:1-DC/Carn C5:1	HbA1C	-0.165	0.879274	-2.4; 2	-0.977	0.536857	-4.2; 2.2	0.478	0.747363	-2.5; 3.5	0.506
ratio Carn C4-OH/Carn C4:1	Waist	-0.169	0.882313	-2.4; 2.1	0.243	0.886282	-3.1; 3.6	0.019	0.988834	-2.8; 2.8	0.918
Carn C3-OH	2 hour OGTT Glucose	14.485	0.888771	-191; 220	-213.455	0.269629	-599; 172	130.158	0.33119	-137; 398	0.143
ratio Carn C4:1/Carn C4	HbA1C	-23.626	0.889667	-361; 314	-32.357	0.889257	-508; 443	82.281	0.736177	-412; 576	0.736
ratio Carn C5/xLeu	Glucose	-857.991	0.89099	-13234; 11518	1183.08	0.86729	-13054; 15420	-2794.22	0.793973	-23701; 18112	0.751
Carn C4-OH	2 hour OGTT Glucose	-20.027	0.89462	-321; 280	-86.148	0.712011	-555; 383	99.44	0.63335	-320; 519	0.552
ratio Carn C5-oxo/Carn C5-OH	Homa	-0.033	0.908218	-0.6; 0.53	0.737	0.299989	-0.7; 2.2	-0.132	0.629611	-0.7; 0.43	0.258
Met	Homa	0.006	0.921726	-0.11; 0.13	0.054	0.59645	-0.16; 0.26	-0.043	0.573551	-0.19; 0.11	0.449
Carn C2	Waist	0.074	0.922774	-1.4; 1.6	0.039	0.971456	-2.1; 2.2	0.179	0.866918	-2; 2.3	0.926
Phe	2 hour OGTT Glucose	0.032	0.936848	-0.76; 0.83	-0.413	0.558762	-1.8; 1	0.325	0.571006	-0.84; 1.5	0.418
ratio Carn C4/Val	2 hour OGTT Glucose	-589.478	0.936911	-15386; 14207	24990.3	0.0497694	-67; 50047	-11164.6	0.266915	-31204; 8874	0.0254
Carn C0	Waist	0.02	0.941207	-0.51; 0.55	-0.327	0.367656	-1.1; 0.4	0.217	0.529968	-0.48; 0.92	0.279
ratio Carn C4/Carn C5-oxo	Homa	0.013	0.955437	-0.47; 0.5	1.042	0.040586	0.031; 2.1	-0.312	0.121273	-0.74; 0.11	0.0147
ratio Carn C5:1/Carn C5	Waist	-1.295	0.959971	-52; 50	6.386	0.885728	-83; 95	-1.534	0.957617	-61; 58	0.881
Phe	Homa	0.002	0.960275	-0.073; 0.077	-0.005	0.944071	-0.16; 0.15	0.006	0.888472	-0.084; 0.097	0.896
Carn C3	HbA1C	2.228	0.963104	-92; 96	-14.409	0.837197	-158; 129	-39.072	0.567156	-171; 93	0.799
ratio Carn C5/Carn C6-oxo	2 hour OGTT Glucose	-0.033	0.967401	-1.6; 1.6	-0.198	0.844641	-2.2; 1.8	-0.485	0.729617	-3.3; 2.3	0.868
Carn C6:1-DC	2 hour OGTT Glucose	1.142	0.971731	-63; 65	-48.281	0.335436	-149; 52	49.869	0.264749	-39; 139	0.144
Carn C0	Glucose	-0.004	0.976348	-0.29; 0.28	-0.245	0.221739	-0.65; 0.16	0.341	0.0869743	-0.051; 0.73	0.0379
Gln	2 hour OGTT Glucose	-0.001	0.985173	-0.07; 0.069	-0.111	0.0543123	-0.22; 0.0018	0.056	0.23361	-0.039; 0.15	0.0245
ratio Carn C4:1/Carn C4	Waist	-1.121	0.987567	-145; 142	-42.641	0.70316	-267; 182	41.425	0.618342	-128; 211	0.548
Carn C3	2 hour OGTT Glucose	-0.449	0.990328	-74; 73	-6.729	0.905318	-121; 107	-1.996	0.970703	-112; 108	0.952
ratio Carn C4/Val	Waist	6.665	0.998744	-8399; 8413	3734.31	0.588502	-10117; 17586	-2008.13	0.681342	-11737; 7721	0.494

## Sheet: S2_Obeldicks_associations_chang
Analyte	ClinicalParameter	Estimate_all	P_all	95%CI_all	Estimate_WL	P_WL	95%CI_WL	Estimate_nWL	P_nWL	95%CI_nWL	P WL vs. nWL (rlm)
Carn C0	Homa	1.103	0.00759619	0.29; 1.9	1.711	0.000134855	0.88; 2.5	0.235	0.751083	-1.3; 1.7	0.086
Tyr	Glucose	0.148	0.00109852	0.061; 0.24	0.219	0.000233344	0.11; 0.33	0.077	0.338088	-0.085; 0.24	0.146
AAA sum	Glucose	0.16	0.0109369	0.037; 0.28	0.28	0.000496539	0.13; 0.43	0.074	0.475623	-0.14; 0.28	0.112
ratio Carn C5-oxo/Carn C5-OH	HbA1C	0.059	0.0745551	-0.0055; 0.12	0.116	0.000888263	0.052; 0.18	-0.081	0.323185	-0.25; 0.085	0.0279
Tyr	Homa	0.79	0.0146816	0.17; 1.4	1.086	0.00125911	0.51; 1.7	0.28	0.650992	-0.99; 1.5	0.245
ratio Carn C5/Carn C6-oxo	Homa	0.24	0.00721039	0.068; 0.41	0.216	0.00169405	0.084; 0.35	0.294	0.0408775	0.016; 0.57	0.608
Gly	HbA1C	-0.025	0.558237	-0.11; 0.058	-0.181	0.00246416	-0.29; -0.067	0.051	0.437837	-0.079; 0.18	0.00813
Carn C6-oxo	Homa	-0.237	0.0136299	-0.43; -0.048	-0.212	0.00260386	-0.35; -0.076	-0.209	0.437884	-0.73; 0.31	0.991
Met	Glucose	0.089	0.0846871	-0.013; 0.19	0.191	0.00291581	0.069; 0.31	0.005	0.956558	-0.17; 0.18	0.0802
ratio Carn C4/Carn C5-oxo	Homa	0.229	0.177399	-0.088; 0.55	0.475	0.00298224	0.18; 0.77	-0.208	0.530408	-0.86; 0.45	0.0574
Carn C6:1-DC	Homa	-0.328	0.014674	-0.59; -0.064	-0.286	0.00304568	-0.47; -0.1	-0.368	0.341781	-1.1; 0.38	0.83
ratio Carn C6-oxo/xLeu	HbA1C	0.025	0.0267691	0.0027; 0.047	0.032	0.00511869	0.0097; 0.054	0.027	0.469026	-0.045; 0.1	0.903
Trp	Glucose	0.183	0.0147428	0.036; 0.33	0.318	0.00529035	0.1; 0.53	0.127	0.236675	-0.089; 0.34	0.21
ratio Carn C6-oxo/xLeu	Homa	-0.187	0.0159549	-0.34; -0.032	-0.148	0.00687004	-0.25; -0.042	-0.239	0.442217	-0.84; 0.37	0.767
Arg	Glucose	0.129	0.0353588	0.0087; 0.25	0.205	0.00817774	0.056; 0.35	0.084	0.421888	-0.12; 0.29	0.342
AAA sum	Homa	0.791	0.05878	-0.035; 1.6	1.04	0.00949067	0.29; 1.8	0.265	0.74184	-1.4; 1.9	0.389
Carn C5-oxo	HbA1C	0.021	0.612624	-0.061; 0.1	0.116	0.0116321	0.027; 0.2	-0.108	0.168978	-0.27; 0.05	0.0145
ratio Carn C4/Carn C5-oxo	HbA1C	-0.03	0.241108	-0.082; 0.022	-0.072	0.0123317	-0.13; -0.016	0.036	0.457728	-0.063; 0.14	0.0574
ratio Carn C5-OH/Carn C5:1	HbA1C	-0.043	0.131725	-0.098; 0.012	-0.074	0.0141191	-0.13; -0.016	0.036	0.54235	-0.078; 0.15	0.0846
Met	HbA1C	0.01	0.838319	-0.081; 0.1	-0.139	0.0155022	-0.25; -0.029	0.224	0.00462896	0.075; 0.37	0.000168
His	Glucose	-0.005	0.940152	-0.13; 0.12	0.203	0.0169212	0.038; 0.37	-0.189	0.0487917	-0.38; -0.0000041	0.00228
Carn C6:1-DC	HbA1C	0.023	0.241714	-0.015; 0.062	0.048	0.0219099	0.0071; 0.089	-0.011	0.815603	-0.1; 0.08	0.236
Pro	Homa	0.812	0.0106156	0.19; 1.4	0.719	0.0227252	0.11; 1.3	0.875	0.0673365	-0.083; 1.8	0.781
ratio Carn C6:1-DC/Carn C5:1	Homa	-0.266	0.0547457	-0.54; 0.0066	-0.22	0.0244363	-0.41; -0.03	-0.386	0.321288	-1.1; 0.37	0.668
Carn C6-oxo	HbA1C	0.027	0.0556748	-0.000053; 0.054	0.035	0.0245691	0.0052; 0.065	0.055	0.110504	-0.012; 0.12	0.584
Trp	Homa	0.927	0.0558835	-0.022; 1.9	1.125	0.0265792	0.14; 2.1	0.44	0.613089	-1.3; 2.2	0.491
Carn C5:1	HbA1C	0.026	0.508911	-0.049; 0.1	0.09	0.0308946	0.013; 0.17	-0.089	0.308359	-0.26; 0.083	0.0569
Val	Homa	0.651	0.0902108	-0.11; 1.4	0.727	0.0327081	0.067; 1.4	0.475	0.544113	-1.1; 2.1	0.77
ratio Carn C5-oxo/Carn C5-OH	Glucose	-0.089	0.0117308	-0.16; -0.022	-0.078	0.0341269	-0.15; -0.0075	-0.114	0.224907	-0.3; 0.068	0.707
Carn C3	Homa	0.336	0.174387	-0.16; 0.83	0.492	0.0363337	0.026; 0.96	0.236	0.61499	-0.72; 1.2	0.628
ratio Carn C5/Carn C6-oxo	HbA1C	-0.024	0.0528657	-0.047; 0.000037	-0.034	0.0423589	-0.067; -0.0015	-0.015	0.450546	-0.054; 0.025	0.445
Phe	Glucose	0.054	0.348817	-0.061; 0.17	0.147	0.0423807	0.0042; 0.29	-0.024	0.810163	-0.23; 0.18	0.17
xLeu	Glucose	0.068	0.249664	-0.049; 0.18	0.136	0.0423871	0.0047; 0.27	0.036	0.755569	-0.2; 0.27	0.45
BCAA sum	Glucose	0.078	0.206019	-0.045; 0.2	0.156	0.0482778	0.0032; 0.31	0.054	0.65048	-0.19; 0.29	0.47
Carn C6-OH	Homa	-0.209	0.359921	-0.67; 0.25	-0.365	0.0518917	-0.74; 0.0059	-0.034	0.945898	-1; 0.97	0.533
BCAA sum	Homa	0.379	0.327552	-0.39; 1.2	0.679	0.051946	-0.0015; 1.4	-0.012	0.989547	-1.9; 1.9	0.497
Val	Glucose	0.079	0.182214	-0.038; 0.2	0.155	0.0600027	-0.0023; 0.31	0.046	0.642322	-0.16; 0.25	0.392
Carn C0	Glucose	0.131	0.0777205	-0.015; 0.28	0.212	0.0622228	-0.0089; 0.43	0.085	0.446543	-0.14; 0.31	0.419
Carn C3	Waist	0.044	0.211808	-0.027; 0.11	0.109	0.0646937	-0.0078; 0.23	0.013	0.74496	-0.068; 0.094	0.175
Met	Homa	0.14	0.670481	-0.51; 0.79	0.513	0.0748753	-0.055; 1.1	-0.563	0.414835	-1.9; 0.79	0.14
xLeu	Homa	0.242	0.505578	-0.49; 0.98	0.555	0.0795916	-0.064; 1.2	-0.143	0.876982	-2; 1.8	0.482
Carn C3-OH	2 hour OGTT Glucose	0.165	0.216067	-0.1; 0.43	0.146	0.0833461	-0.023; 0.31	0.199	0.52052	-0.41; 0.8	0.865
ratio Carn C6-oxo/xLeu	Glucose	-0.03	0.0225151	-0.056; -0.0043	-0.024	0.0862406	-0.051; 0.0036	-0.065	0.0735869	-0.14; 0.0063	0.281
Carn C6-oxo	Glucose	-0.038	0.014872	-0.068; -0.0075	-0.031	0.088528	-0.066; 0.0047	-0.048	0.130499	-0.11; 0.015	0.622
Gln	Glucose	0.038	0.581881	-0.099; 0.18	0.165	0.0895551	-0.026; 0.36	-0.063	0.572307	-0.29; 0.16	0.119
Carn C5	2 hour OGTT Glucose	-0.03	0.730156	-0.2; 0.14	-0.109	0.0921094	-0.24; 0.019	0.014	0.919604	-0.27; 0.3	0.425
Carn C6:1-DC	Glucose	-0.039	0.0613235	-0.08; 0.002	-0.038	0.0983761	-0.084; 0.0076	-0.019	0.696865	-0.12; 0.079	0.722
Carn C2	Glucose	-0.071	0.0155673	-0.13; -0.014	-0.063	0.101347	-0.14; 0.013	-0.092	0.0284229	-0.18; -0.008	0.608
Carn C2	Homa	-0.101	0.628336	-0.5; 0.29	-0.301	0.112533	-0.67; 0.07	0.279	0.48745	-0.45; 1	0.156
Phe	Homa	0.185	0.625655	-0.58; 0.95	0.486	0.119277	-0.13; 1.1	-0.094	0.911364	-1.8; 1.6	0.524
Val	2 hour OGTT Glucose	-0.11	0.40905	-0.38; 0.15	-0.149	0.120838	-0.35; 0.047	-0.159	0.494316	-0.63; 0.31	0.97
ratio Carn C5/xLeu	2 hour OGTT Glucose	0.024	0.795689	-0.16; 0.2	-0.108	0.121457	-0.24; 0.029	0.014	0.913561	-0.25; 0.28	0.408
ratio Carn C5-OH/Carn C5:1	Homa	0.192	0.352222	-0.22; 0.61	0.264	0.125269	-0.073; 0.6	-0.338	0.546829	-1.5; 0.8	0.307
Orn	Homa	0.027	0.903787	-0.42; 0.48	0.28	0.127804	-0.08; 0.64	-0.031	0.95556	-1.2; 1.1	0.603
Carn C5:1	Homa	-0.258	0.352027	-0.82; 0.31	-0.306	0.134793	-0.71; 0.1	0.063	0.933634	-1.5; 1.6	0.643
Ser	2 hour OGTT Glucose	-0.201	0.0824578	-0.43; 0.027	-0.119	0.137626	-0.28; 0.043	-0.154	0.489126	-0.6; 0.3	0.884
ratio Carn C4-OH/Carn C4:1	Homa	-0.087	0.53231	-0.36; 0.19	-0.217	0.137981	-0.51; 0.073	0.147	0.607368	-0.43; 0.72	0.254
BCAA sum	2 hour OGTT Glucose	-0.112	0.432747	-0.4; 0.17	-0.145	0.140523	-0.35; 0.055	0.101	0.684034	-0.41; 0.61	0.365
ratio Carn C4/Val	2 hour OGTT Glucose	0.076	0.328478	-0.079; 0.23	0.072	0.141433	-0.028; 0.17	0.004	0.981639	-0.33; 0.34	0.69
Carn C3:1	2 hour OGTT Glucose	-0.004	0.958342	-0.15; 0.14	-0.11	0.156958	-0.26; 0.036	0.049	0.593243	-0.14; 0.24	0.181
Pro	Waist	0.008	0.843978	-0.077; 0.094	-0.086	0.158304	-0.21; 0.04	0.061	0.163031	-0.029; 0.15	0.0582
ratio Carn C5:1/Carn C5	Homa	-0.359	0.103156	-0.8; 0.084	-0.261	0.158795	-0.63; 0.11	-0.032	0.953513	-1.1; 1.1	0.691
Carn C6-OH	HbA1C	0.028	0.332292	-0.03; 0.087	0.047	0.160217	-0.021; 0.12	-0.035	0.578264	-0.16; 0.088	0.241
ratio Carn C6:1-DC/Carn C5:1	Glucose	-0.04	0.0587656	-0.082; 0.0016	-0.033	0.160993	-0.079; 0.014	-0.052	0.303582	-0.15; 0.049	0.727
Carn C4-OH	Waist	0.017	0.327942	-0.019; 0.052	0.03	0.162496	-0.016; 0.076	-0.013	0.608912	-0.067; 0.04	0.216
ratio Carn C5/Carn C6-oxo	Glucose	0.03	0.0275676	0.0034; 0.056	0.026	0.167643	-0.011; 0.064	0.029	0.150394	-0.011; 0.07	0.909
AAA sum	HbA1C	-0.003	0.957838	-0.12; 0.11	-0.102	0.168105	-0.25; 0.042	0.115	0.255728	-0.083; 0.31	0.0769
Carn C2	HbA1C	0.012	0.670847	-0.044; 0.068	0.049	0.173228	-0.021; 0.12	-0.043	0.403598	-0.14; 0.058	0.134
xLeu	2 hour OGTT Glucose	-0.12	0.380265	-0.39; 0.15	-0.121	0.179327	-0.31; 0.062	0.146	0.533464	-0.34; 0.63	0.299
Carn C3:1	HbA1C	0.031	0.350385	-0.035; 0.096	-0.057	0.182274	-0.14; 0.029	0.101	0.0370233	0.0045; 0.2	0.0153
ratio Carn C5:1/Carn C5	HbA1C	0.076	0.0265356	0.0094; 0.14	0.058	0.190279	-0.027; 0.14	0.073	0.274587	-0.062; 0.21	0.848
Carn C0	HbA1C	-0.065	0.306214	-0.19; 0.063	-0.11	0.196518	-0.28; 0.06	-0.027	0.787811	-0.23; 0.18	0.527
ratio Carn C4/Carn C5-oxo	Glucose	0.038	0.185769	-0.018; 0.093	0.044	0.198255	-0.024; 0.11	0.013	0.805461	-0.092; 0.12	0.623
Carn C5-oxo	Glucose	-0.093	0.0290337	-0.18; -0.01	-0.066	0.200586	-0.17; 0.037	-0.122	0.121408	-0.28; 0.033	0.545
Carn C5	Glucose	0.036	0.368678	-0.043; 0.11	0.066	0.20925	-0.038; 0.17	0.015	0.823355	-0.12; 0.15	0.555
Carn C4:1	Waist	0.029	0.359012	-0.035; 0.093	0.055	0.218484	-0.037; 0.15	-0.044	0.4699	-0.17; 0.078	0.194
Carn C4-OH	Homa	-0.055	0.651951	-0.3; 0.19	-0.118	0.224286	-0.31; 0.076	0.444	0.247277	-0.24; 1.1	0.112
Phe	HbA1C	-0.018	0.724434	-0.12; 0.084	-0.072	0.229068	-0.19; 0.046	0.081	0.384153	-0.11; 0.27	0.164
ratio Carn C4-OH/Carn C4:1	HbA1C	-0.003	0.87433	-0.04; 0.034	0.03	0.237902	-0.022; 0.082	-0.027	0.338709	-0.086; 0.031	0.138
Carn C4	Homa	0.199	0.395932	-0.27; 0.67	0.263	0.241513	-0.17; 0.7	-0.266	0.574394	-1.2; 0.71	0.32
His	2 hour OGTT Glucose	-0.144	0.34443	-0.45; 0.16	-0.144	0.244421	-0.39; 0.097	-0.094	0.693247	-0.58; 0.39	0.853
Arg	Waist	-0.011	0.841726	-0.13; 0.1	-0.102	0.252193	-0.29; 0.082	0.07	0.29349	-0.066; 0.21	0.133
Gln	Waist	0.007	0.913404	-0.12; 0.13	-0.114	0.253512	-0.31; 0.085	0.079	0.291954	-0.074; 0.23	0.124
Tyr	HbA1C	0.019	0.681895	-0.068; 0.1	-0.06	0.255768	-0.16; 0.043	0.159	0.0494436	-0.0000082; 0.32	0.0219
Val	Waist	0.084	0.105291	-0.021; 0.19	0.092	0.262104	-0.076; 0.26	0.051	0.459931	-0.089; 0.19	0.705
Pro	Glucose	0.07	0.143334	-0.024; 0.16	0.082	0.263895	-0.065; 0.23	0.072	0.286462	-0.064; 0.21	0.919
Carn C3	Glucose	0.041	0.303626	-0.037; 0.12	0.062	0.265855	-0.049; 0.17	0.043	0.507954	-0.087; 0.17	0.827
Carn C5-oxo	Waist	0.011	0.787416	-0.068; 0.09	0.059	0.266768	-0.047; 0.16	-0.064	0.245648	-0.18; 0.047	0.108
Trp	2 hour OGTT Glucose	-0.021	0.903885	-0.36; 0.32	-0.165	0.27192	-0.47; 0.14	-0.075	0.757844	-0.57; 0.42	0.755
Trp	HbA1C	-0.013	0.852613	-0.15; 0.13	-0.111	0.272706	-0.31; 0.082	0.049	0.646897	-0.17; 0.27	0.264
ratio Carn C5:1/Carn C5	2 hour OGTT Glucose	0.024	0.762646	-0.13; 0.18	0.057	0.274719	-0.045; 0.16	0.055	0.725008	-0.26; 0.37	0.989
ratio Carn C4:1/Carn C4	Homa	-0.13	0.452655	-0.48; 0.22	-0.134	0.276654	-0.38; 0.11	0.331	0.51401	-0.71; 1.4	0.382
Carn C4:1	HbA1C	-0.044	0.161674	-0.11; 0.02	-0.037	0.280624	-0.11; 0.033	-0.05	0.507454	-0.2; 0.1	0.875
Carn C5	Waist	0.006	0.853464	-0.061; 0.073	0.061	0.29766	-0.055; 0.18	-0.049	0.22747	-0.13; 0.034	0.12
Thr	2 hour OGTT Glucose	-0.143	0.127597	-0.33; 0.042	-0.08	0.31083	-0.24; 0.079	-0.152	0.279173	-0.44; 0.13	0.653
Arg	HbA1C	-0.015	0.795395	-0.13; 0.1	-0.077	0.310963	-0.22; 0.07	0.066	0.516636	-0.14; 0.27	0.25
ratio Carn C4:1/Carn C4	2 hour OGTT Glucose	-0.062	0.284271	-0.18; 0.053	-0.036	0.312846	-0.11; 0.037	0.043	0.763798	-0.24; 0.33	0.584
BCAA sum	Waist	0.077	0.16057	-0.034; 0.19	0.079	0.316466	-0.084; 0.24	0.077	0.364429	-0.093; 0.25	0.982
ratio Carn C5-oxo/Carn C5-OH	Waist	0.019	0.572325	-0.047; 0.085	0.039	0.316486	-0.04; 0.12	-0.042	0.46035	-0.16; 0.071	0.236
Carn C3:1	Homa	-0.118	0.57149	-0.54; 0.3	-0.232	0.32018	-0.7; 0.24	-0.178	0.583784	-0.85; 0.49	0.893
Carn C5-OH	Glucose	0.019	0.704095	-0.077; 0.12	0.058	0.325767	-0.052; 0.17	-0.011	0.906082	-0.19; 0.17	0.52
Carn C5-oxo	Homa	-0.316	0.276118	-0.88; 0.25	-0.239	0.340726	-0.74; 0.27	-0.669	0.302939	-1.9; 0.56	0.514
Carn C4:1	Glucose	0.051	0.167015	-0.022; 0.12	0.043	0.34266	-0.047; 0.13	0.083	0.331259	-0.09; 0.26	0.674
Carn C4	2 hour OGTT Glucose	0.046	0.5586	-0.11; 0.2	0.057	0.348379	-0.068; 0.18	-0.047	0.717658	-0.31; 0.22	0.472
ratio Carn C4/Val	Glucose	-0.053	0.138929	-0.12; 0.018	-0.037	0.349796	-0.12; 0.042	-0.124	0.0748665	-0.26; 0.014	0.271
ratio Carn C5/Carn C6-oxo	Waist	0.02	0.0811341	-0.0024; 0.043	0.02	0.352598	-0.023; 0.063	0.016	0.243593	-0.011; 0.043	0.873
Thr	Homa	-0.171	0.528159	-0.7; 0.36	0.246	0.353618	-0.26; 0.76	-0.331	0.499196	-1.3; 0.67	0.3
ratio Carn C5/xLeu	Homa	0.015	0.951899	-0.48; 0.51	-0.236	0.359754	-0.76; 0.28	-0.098	0.832753	-1; 0.85	0.797
Carn C5:1	2 hour OGTT Glucose	-0.005	0.95761	-0.2; 0.19	-0.058	0.360646	-0.19; 0.072	0.204	0.346246	-0.23; 0.64	0.248
Carn C6-OH	Glucose	-0.049	0.174353	-0.12; 0.022	-0.039	0.366814	-0.12; 0.047	-0.098	0.151019	-0.23; 0.034	0.446
Carn C5	Homa	0.14	0.565976	-0.35; 0.63	0.197	0.377325	-0.25; 0.64	-0.145	0.76144	-1.1; 0.83	0.521
ratio Carn C4-OH/Carn C4:1	Waist	0.01	0.612428	-0.031; 0.052	0.03	0.388272	-0.043; 0.1	-0.004	0.857068	-0.049; 0.041	0.425
ratio Carn C5/xLeu	HbA1C	-0.101	0.0114052	-0.18; -0.025	0.045	0.40367	-0.059; 0.15	-0.191	0.00110367	-0.3; -0.083	0.00219
xLeu	Waist	0.065	0.203517	-0.039; 0.17	0.062	0.409381	-0.093; 0.22	0.09	0.279149	-0.076; 0.26	0.804
Arg	Homa	0.302	0.453035	-0.5; 1.1	0.307	0.418117	-0.44; 1.1	0.381	0.629917	-1.2; 2	0.932
ratio Carn C4:1/Carn C4	Glucose	0.045	0.078462	-0.0057; 0.096	0.023	0.432634	-0.036; 0.082	0.12	0.0264954	0.013; 0.23	0.112
Gln	2 hour OGTT Glucose	-0.087	0.580779	-0.4; 0.23	-0.102	0.438532	-0.37; 0.17	-0.032	0.891052	-0.52; 0.45	0.799
Carn C0	Waist	0.085	0.168777	-0.04; 0.21	0.091	0.444042	-0.15; 0.33	0.053	0.429009	-0.086; 0.19	0.787
Carn C6-OH	Waist	0.018	0.575096	-0.047; 0.082	0.034	0.453862	-0.061; 0.13	-0.003	0.94113	-0.091; 0.085	0.561
Thr	HbA1C	0.008	0.841009	-0.069; 0.085	-0.039	0.46386	-0.14; 0.066	0.065	0.309518	-0.062; 0.19	0.205
Carn C5-OH	Homa	-0.065	0.836169	-0.68; 0.55	-0.176	0.466863	-0.67; 0.31	-0.217	0.768951	-1.7; 1.3	0.958
ratio Carn C4-OH/Carn C4:1	Glucose	-0.03	0.173966	-0.073; 0.014	-0.023	0.474359	-0.088; 0.042	-0.039	0.160653	-0.095; 0.018	0.717
Carn C2	Waist	0.007	0.78215	-0.046; 0.061	0.031	0.474554	-0.06; 0.12	-0.031	0.321829	-0.096; 0.033	0.262
Carn C5-OH	HbA1C	-0.041	0.335681	-0.13; 0.044	-0.034	0.480928	-0.13; 0.063	-0.028	0.727235	-0.2; 0.14	0.957
xLeu	HbA1C	0.096	0.0788333	-0.00037; 0.19	-0.041	0.495342	-0.16; 0.078	0.366	0.000611713	0.17; 0.56	0.000648
Pro	HbA1C	-0.011	0.781831	-0.095; 0.072	-0.038	0.497619	-0.15; 0.075	0.009	0.893836	-0.13; 0.14	0.589
Carn C5-OH	2 hour OGTT Glucose	-0.064	0.548032	-0.28; 0.15	-0.052	0.502144	-0.21; 0.1	0.007	0.974074	-0.4; 0.41	0.786
ratio Carn C5-oxo/Carn C5-OH	2 hour OGTT Glucose	0.094	0.238865	-0.065; 0.25	0.037	0.507222	-0.073; 0.15	0.293	0.11509	-0.078; 0.66	0.185
Carn C4	HbA1C	-0.028	0.377964	-0.091; 0.035	-0.027	0.507393	-0.11; 0.056	-0.007	0.896783	-0.12; 0.11	0.77
ratio Carn C4:1/Carn C4	HbA1C	-0.009	0.691219	-0.052; 0.035	-0.014	0.510712	-0.058; 0.03	-0.01	0.859115	-0.12; 0.1	0.942
ratio Carn C5:1/Carn C5	Glucose	-0.027	0.440382	-0.096; 0.042	-0.027	0.516221	-0.11; 0.056	-0.017	0.817233	-0.17; 0.13	0.908
His	Homa	-0.14	0.750154	-1; 0.73	0.248	0.520782	-0.53; 1	-1.115	0.243881	-3; 0.8	0.185
Carn C3	2 hour OGTT Glucose	0.03	0.728115	-0.14; 0.2	-0.045	0.532732	-0.2; 0.1	0.07	0.602826	-0.2; 0.34	0.455
Carn C4-OH	HbA1C	-0.006	0.69888	-0.04; 0.027	0.011	0.536161	-0.027; 0.05	-0.042	0.232321	-0.11; 0.028	0.178
Carn C5:1	Waist	0.006	0.871685	-0.074; 0.087	0.032	0.537072	-0.077; 0.14	-0.04	0.52173	-0.17; 0.089	0.393
Gly	2 hour OGTT Glucose	-0.054	0.607912	-0.26; 0.16	-0.062	0.54191	-0.27; 0.15	-0.09	0.559627	-0.4; 0.22	0.882
ratio Carn C5-OH/Carn C5:1	Glucose	0.002	0.949948	-0.063; 0.068	0.023	0.548644	-0.052; 0.098	-0.05	0.39932	-0.17; 0.069	0.296
Orn	Waist	0.004	0.902249	-0.061; 0.07	0.029	0.559999	-0.072; 0.13	0.02	0.656379	-0.068; 0.11	0.89
ratio Carn C4/Carn C5-oxo	Waist	0.027	0.23898	-0.019; 0.072	0.024	0.560553	-0.058; 0.1	0.025	0.346138	-0.029; 0.079	0.976
Ser	Homa	-0.512	0.134024	-1.2; 0.16	-0.161	0.573702	-0.73; 0.4	-0.587	0.411159	-2.1; 0.88	0.584
Orn	HbA1C	-0.014	0.667156	-0.078; 0.05	-0.02	0.576191	-0.092; 0.052	0.018	0.786408	-0.12; 0.15	0.615
Carn C4	Waist	0.022	0.47261	-0.041; 0.086	0.028	0.584244	-0.079; 0.13	0.002	0.956683	-0.076; 0.08	0.691
Phe	Waist	0.022	0.668696	-0.081; 0.12	0.041	0.594277	-0.11; 0.19	0.031	0.62377	-0.096; 0.16	0.923
Met	Waist	0.011	0.81118	-0.081; 0.1	-0.037	0.598861	-0.18; 0.11	0.062	0.257013	-0.049; 0.17	0.274
ratio Carn C4/Carn C5-oxo	2 hour OGTT Glucose	-0.026	0.618602	-0.13; 0.078	0.023	0.603732	-0.069; 0.12	-0.085	0.285133	-0.24; 0.075	0.237
Carn C3:1	Waist	0.033	0.239064	-0.025; 0.091	0.031	0.606512	-0.098; 0.16	0.029	0.343447	-0.033; 0.091	0.971
Thr	Glucose	-0.014	0.745118	-0.096; 0.069	0.03	0.60786	-0.088; 0.15	-0.039	0.552935	-0.17; 0.092	0.432
Carn C3:1	Glucose	0.014	0.701298	-0.058; 0.085	-0.028	0.608996	-0.14; 0.081	0.044	0.42984	-0.069; 0.16	0.358
Thr	Waist	0.005	0.892731	-0.069; 0.079	-0.03	0.627289	-0.16; 0.099	0.041	0.371575	-0.051; 0.13	0.367
ratio Carn C4/Val	Homa	-0.096	0.692037	-0.59; 0.39	-0.082	0.641096	-0.44; 0.28	-0.639	0.318934	-2; 0.67	0.409
ratio Carn C4/Val	HbA1C	-0.046	0.164626	-0.11; 0.019	-0.015	0.64188	-0.08; 0.05	-0.081	0.260056	-0.23; 0.064	0.402
ratio Carn C5/xLeu	Glucose	0	0.998292	-0.085; 0.085	-0.026	0.654275	-0.14; 0.091	0.008	0.912912	-0.14; 0.15	0.712
ratio Carn C4:1/Carn C4	Waist	-0.003	0.908117	-0.049; 0.044	0.012	0.659654	-0.046; 0.07	-0.035	0.40414	-0.12; 0.052	0.363
ratio Carn C6:1-DC/Carn C5:1	HbA1C	0.011	0.599193	-0.029; 0.05	0.009	0.659832	-0.033; 0.051	0.039	0.388554	-0.05; 0.13	0.538
ratio Carn C5-oxo/Carn C5-OH	Homa	-0.177	0.450872	-0.64; 0.28	-0.076	0.670953	-0.44; 0.28	0.247	0.741201	-1.1; 1.6	0.651
AAA sum	2 hour OGTT Glucose	-0.025	0.86112	-0.31; 0.26	-0.05	0.673195	-0.29; 0.19	-0.112	0.640987	-0.6; 0.38	0.819
Carn C6-oxo	2 hour OGTT Glucose	-0.031	0.368006	-0.099; 0.037	-0.01	0.687587	-0.058; 0.039	-0.011	0.875801	-0.16; 0.14	0.981
Carn C5	HbA1C	-0.069	0.062403	-0.14; 0.0031	-0.018	0.690921	-0.11; 0.075	-0.109	0.0771286	-0.23; 0.012	0.233
Carn C3-OH	HbA1C	-0.003	0.956108	-0.11; 0.1	-0.023	0.694765	-0.14; 0.095	0.032	0.797614	-0.22; 0.28	0.686
Gln	HbA1C	0.074	0.254712	-0.05; 0.2	-0.033	0.698752	-0.19; 0.13	0.155	0.17157	-0.067; 0.38	0.17
ratio Carn C6:1-DC/Carn C5:1	2 hour OGTT Glucose	-0.026	0.544689	-0.11; 0.06	0.013	0.703712	-0.053; 0.079	-0.063	0.495858	-0.25; 0.13	0.446
Orn	Glucose	-0.065	0.0708899	-0.13; 0.0045	-0.016	0.705926	-0.1; 0.069	-0.087	0.166704	-0.21; 0.038	0.348
Phe	2 hour OGTT Glucose	-0.101	0.43546	-0.36; 0.16	-0.036	0.712091	-0.23; 0.16	-0.072	0.758313	-0.55; 0.41	0.887
Ser	HbA1C	0.004	0.932548	-0.087; 0.095	-0.02	0.717207	-0.13; 0.087	0.052	0.562409	-0.13; 0.23	0.484
Trp	Waist	0.099	0.130404	-0.032; 0.23	-0.046	0.717919	-0.3; 0.21	0.128	0.0857642	-0.021; 0.28	0.242
Orn	2 hour OGTT Glucose	-0.085	0.279961	-0.24; 0.072	-0.021	0.718521	-0.14; 0.096	-0.076	0.609464	-0.38; 0.22	0.731
Carn C0	2 hour OGTT Glucose	0.055	0.736398	-0.27; 0.38	0.052	0.725444	-0.25; 0.36	-0.041	0.852208	-0.49; 0.41	0.73
Gly	Waist	0.026	0.517187	-0.057; 0.11	-0.025	0.740399	-0.18; 0.13	0.047	0.280525	-0.042; 0.13	0.425
Carn C2	2 hour OGTT Glucose	0.05	0.449927	-0.083; 0.18	0.017	0.740483	-0.089; 0.12	0.014	0.897307	-0.2; 0.23	0.975
Carn C4	Glucose	-0.017	0.645695	-0.09; 0.056	0.015	0.752951	-0.083; 0.11	-0.053	0.362094	-0.17; 0.064	0.369
Gln	Homa	-0.131	0.761594	-0.99; 0.73	-0.13	0.760159	-0.97; 0.71	-0.336	0.699844	-2.1; 1.4	0.832
Val	HbA1C	0.07	0.184392	-0.031; 0.17	0.02	0.767165	-0.11; 0.15	0.153	0.125139	-0.04; 0.35	0.253
ratio Carn C5/xLeu	Waist	-0.019	0.606658	-0.09; 0.053	0.019	0.769817	-0.11; 0.15	-0.069	0.0881103	-0.15; 0.012	0.245
Gly	Homa	-0.021	0.946024	-0.61; 0.57	0.088	0.776248	-0.54; 0.72	-0.276	0.635343	-1.5; 0.91	0.584
Gly	Glucose	-0.016	0.738747	-0.11; 0.078	0.021	0.77656	-0.13; 0.17	-0.032	0.656264	-0.18; 0.11	0.606
Carn C4:1	2 hour OGTT Glucose	-0.057	0.492051	-0.22; 0.11	-0.016	0.789059	-0.14; 0.11	-0.114	0.530999	-0.48; 0.25	0.606
ratio Carn C5/Carn C6-oxo	2 hour OGTT Glucose	-0.008	0.786559	-0.069; 0.053	-0.006	0.791927	-0.054; 0.041	-0.044	0.334781	-0.14; 0.048	0.461
Arg	2 hour OGTT Glucose	-0.032	0.824703	-0.32; 0.25	0.031	0.792978	-0.2; 0.26	-0.102	0.637329	-0.54; 0.34	0.592
Carn C5-oxo	2 hour OGTT Glucose	0.109	0.248221	-0.079; 0.3	0.02	0.794299	-0.13; 0.17	0.294	0.0718991	-0.03; 0.62	0.123
Carn C5:1	Glucose	-0.006	0.896731	-0.093; 0.081	-0.013	0.795211	-0.11; 0.085	0.026	0.788452	-0.17; 0.22	0.72
Carn C6:1-DC	Waist	-0.01	0.595931	-0.048; 0.028	0.006	0.808527	-0.045; 0.057	-0.027	0.389148	-0.089; 0.036	0.412
Carn C4:1	Homa	0.013	0.955864	-0.47; 0.5	-0.042	0.817541	-0.42; 0.33	0.19	0.756725	-1.1; 1.5	0.724
His	Waist	0.013	0.827243	-0.11; 0.13	-0.021	0.827777	-0.22; 0.18	0.048	0.485418	-0.092; 0.19	0.565
ratio Carn C4-OH/Carn C4:1	2 hour OGTT Glucose	0.014	0.767305	-0.08; 0.11	0.01	0.831095	-0.086; 0.11	0.009	0.899602	-0.13; 0.15	0.989
ratio Carn C5-OH/Carn C5:1	Waist	-0.01	0.734486	-0.069; 0.05	-0.008	0.836437	-0.089; 0.073	-0.015	0.715064	-0.1; 0.07	0.898
ratio Carn C5-OH/Carn C5:1	2 hour OGTT Glucose	-0.047	0.516276	-0.19; 0.099	0.011	0.838551	-0.096; 0.12	-0.113	0.407774	-0.39; 0.17	0.405
Ser	Glucose	-0.044	0.402412	-0.15; 0.06	0.013	0.841742	-0.12; 0.14	-0.089	0.349075	-0.28; 0.1	0.377
Carn C6-OH	2 hour OGTT Glucose	-0.022	0.786171	-0.18; 0.14	-0.012	0.843917	-0.14; 0.11	0.021	0.883027	-0.27; 0.31	0.833
Ser	Waist	0	0.991732	-0.095; 0.094	-0.013	0.845465	-0.15; 0.13	0.064	0.330121	-0.065; 0.19	0.413
ratio Carn C5:1/Carn C5	Waist	0	0.993861	-0.061; 0.062	0.009	0.849782	-0.084; 0.1	0.041	0.375751	-0.052; 0.13	0.621
Carn C6-oxo	Waist	-0.011	0.382589	-0.038; 0.015	-0.003	0.854948	-0.039; 0.033	-0.012	0.586253	-0.054; 0.031	0.757
Carn C3	HbA1C	-0.034	0.311176	-0.1; 0.033	-0.008	0.87715	-0.11; 0.091	-0.014	0.819944	-0.13; 0.11	0.94
ratio Carn C4/Val	Waist	-0.001	0.98413	-0.065; 0.064	0.006	0.878504	-0.08; 0.093	-0.012	0.809037	-0.11; 0.089	0.786
Carn C4-OH	2 hour OGTT Glucose	-0.005	0.899908	-0.086; 0.076	-0.004	0.887384	-0.067; 0.059	-0.01	0.906254	-0.18; 0.16	0.951
Carn C4-OH	Glucose	-0.011	0.578937	-0.05; 0.028	0.003	0.899618	-0.042; 0.048	-0.048	0.128866	-0.11; 0.017	0.197
Carn C3-OH	Glucose	0.011	0.863796	-0.11; 0.13	0.008	0.90068	-0.13; 0.14	-0.068	0.602896	-0.32; 0.18	0.587
ratio Carn C6-oxo/xLeu	2 hour OGTT Glucose	-0.028	0.343735	-0.086; 0.031	-0.002	0.901921	-0.04; 0.036	-0.022	0.781178	-0.19; 0.14	0.81
His	HbA1C	0.096	0.091773	-0.012; 0.2	0.009	0.906143	-0.14; 0.16	0.266	0.00948475	0.071; 0.46	0.0398
Carn C5-OH	Waist	-0.015	0.719247	-0.1; 0.07	-0.006	0.915626	-0.12; 0.11	-0.045	0.474968	-0.17; 0.081	0.65
Carn C6:1-DC	2 hour OGTT Glucose	-0.028	0.527294	-0.12; 0.06	0.003	0.923596	-0.062; 0.068	-0.013	0.893124	-0.21; 0.18	0.876
Met	2 hour OGTT Glucose	-0.074	0.533037	-0.31; 0.16	-0.009	0.924047	-0.19; 0.18	-0.076	0.69643	-0.47; 0.32	0.753
AAA sum	Waist	0.067	0.234095	-0.046; 0.18	0.008	0.934376	-0.18; 0.2	0.089	0.164473	-0.041; 0.22	0.472
ratio Carn C6-oxo/xLeu	Waist	-0.01	0.371537	-0.034; 0.013	-0.001	0.939238	-0.03; 0.028	-0.024	0.344533	-0.076; 0.027	0.422
BCAA sum	HbA1C	0.106	0.0598851	0.0039; 0.21	0.005	0.940445	-0.13; 0.14	0.341	0.00345674	0.12; 0.56	0.0104
Tyr	2 hour OGTT Glucose	0.005	0.96653	-0.21; 0.22	-0.006	0.943803	-0.18; 0.17	-0.068	0.718559	-0.45; 0.31	0.766
Pro	2 hour OGTT Glucose	-0.121	0.237825	-0.33; 0.084	-0.006	0.948123	-0.2; 0.19	-0.217	0.14419	-0.52; 0.083	0.235
Carn C3-OH	Homa	-0.027	0.946049	-0.81; 0.76	-0.015	0.959286	-0.61; 0.58	-1.045	0.301512	-3; 0.9	0.308
Carn C3-OH	Waist	0.032	0.558421	-0.078; 0.14	0.003	0.961005	-0.14; 0.15	0.06	0.510652	-0.13; 0.25	0.632
ratio Carn C6:1-DC/Carn C5:1	Waist	-0.011	0.550342	-0.05; 0.027	-0.001	0.970577	-0.051; 0.049	-0.019	0.520578	-0.08; 0.041	0.636
Tyr	Waist	0.045	0.279165	-0.04; 0.13	-0.001	0.989636	-0.14; 0.14	0.07	0.187692	-0.039; 0.18	0.415

## Sheet: S3_Obeldicks_associations_end
Analyte	ClinicalParameter	Estimate_all	P_all	95%CI_all	Estimate_WL	P_WL	95%CI_WL	Estimate_nWL	P_nWL	95%CI_nWL	P WL vs. nWL (rlm)
ratio Carn C5/Carn C6-oxo	Glucose	0.514	0.0110904	0.12; 0.91	0.152	0.591013	-0.42; 0.73	0.727	0.00804085	0.2; 1.3	0.139
Gln	2 hour OGTT Glucose	-0.059	0.0657744	-0.12; 0.0044	-0.02	0.377437	-0.065; 0.025	-0.112	0.0105639	-0.2; -0.027	0.0569
Carn C3-OH	2 hour OGTT Glucose	-8.224	0.934384	-207; 190	49.765	0.584447	-134; 233	-313.376	0.0122956	-556; -71	0.0182
Trp	Glucose	0.133	0.035029	0.011; 0.25	-0.089	0.380993	-0.29; 0.11	0.192	0.0181967	0.033; 0.35	0.0291
Carn C5-OH	HbA1C	-977.935	0.0860136	-2093; 137	-549.42	0.528623	-2283; 1184	-1686.38	0.0262172	-3138; -235	0.312
Arg	Glucose	0.075	0.0324777	0.0057; 0.14	0.028	0.6229	-0.086; 0.14	0.108	0.0292546	0.013; 0.2	0.281
ratio Carn C5/xLeu	HbA1C	-68860.2	0.0162518	-124194; -13527	-27105.1	0.491425	-105323; 51113	-94292.9	0.0306188	-179188; -9398	0.242
Pro	Glucose	0.044	0.00518551	0.014; 0.074	0.034	0.156543	-0.015; 0.084	0.046	0.0339498	0.0037; 0.087	0.73
AAA sum	Waist	0.076	0.079969	-0.01; 0.16	-0.015	0.80233	-0.14; 0.11	0.085	0.0393786	0.0033; 0.17	0.174
ratio Carn C4/Carn C5-oxo	Glucose	0.975	0.0820837	-0.099; 2	0.152	0.862341	-1.6; 1.9	1.532	0.0473861	0.038; 3	0.235
ratio Carn C5-OH/Carn C5:1	Homa	0.053	0.926916	-1.1; 1.2	0.176	0.641354	-0.59; 0.94	1.9	0.0481259	0.018; 3.8	0.0899
ratio Carn C5-OH/Carn C5:1	HbA1C	-17.439	0.0277199	-33; -1.8	-13.46	0.280103	-39; 12	-21.241	0.050261	-43; 0.35	0.636
Met	Waist	0.349	0.208761	-0.19; 0.89	0.053	0.877271	-0.65; 0.76	0.542	0.0524652	0.0076; 1.1	0.267
Carn C4	Glucose	17.687	0.0419332	0.75; 35	-8.911	0.601398	-44; 26	21.874	0.0562646	-0.59; 44	0.135
Met	2 hour OGTT Glucose	-0.349	0.459151	-1.3; 0.59	0.193	0.54073	-0.44; 0.83	-1.206	0.057596	-2.5; 0.049	0.0477
Tyr	Waist	0.132	0.104582	-0.03; 0.29	-0.034	0.783392	-0.29; 0.22	0.142	0.0584373	-0.0083; 0.29	0.228
ratio Carn C4/Val	Glucose	2823.96	0.156317	-1129; 6777	832.703	0.740573	-4273; 5938	6117.84	0.0611512	-304; 12539	0.196
Arg	HbA1C	0.384	0.0565581	-0.005; 0.77	0.207	0.468896	-0.37; 0.78	0.478	0.0611579	-0.0055; 0.96	0.468
Carn C3	Waist	28.474	0.102958	-5.9; 63	-16.677	0.550588	-74; 40	30.034	0.061846	-2; 62	0.152
Pro	Waist	0.068	0.071994	-0.0055; 0.14	0.016	0.737823	-0.083; 0.12	0.068	0.0633873	-0.0037; 0.14	0.398
ratio Carn C5:1/Carn C5	HbA1C	98.893	0.0744718	-11; 209	72.089	0.354288	-87; 231	144.257	0.066758	-12; 301	0.514
Orn	2 hour OGTT Glucose	-0.509	0.00189425	-0.82; -0.19	-0.216	0.0394104	-0.42; -0.0098	-0.483	0.0669385	-1; 0.037	0.337
ratio Carn C5-OH/Carn C5:1	2 hour OGTT Glucose	-1.283	0.824852	-13; 10	5.296	0.243138	-3.6; 14	14.38	0.0749059	-1.5; 30	0.317
Carn C4:1	Glucose	401.911	0.179448	-194; 1000	120.223	0.735304	-604; 844	939.678	0.0750647	-118; 1997	0.2
Carn C6-OH	HbA1C	-1004.13	0.324962	-3013; 1005	-825.81	0.556729	-3670; 2019	-2668.5	0.0795817	-5532; 195	0.358
Carn C4:1	2 hour OGTT Glucose	-1169.14	0.315259	-3479; 1141	-1050.91	0.129536	-2426; 324	-3448.01	0.0858763	-7425; 529	0.253
Carn C3-OH	HbA1C	158.933	0.222352	100; 417	-81.682	0.745282	-596; 432	296.344	0.0913941	-49; 642	0.22
AAA sum	Glucose	0.031	0.109521	-0.0072; 0.069	-0.014	0.647158	-0.075; 0.047	0.045	0.0933009	-0.0084; 0.099	0.145
Carn C5-OH	Homa	59.728	0.142784	-21; 140	17.236	0.513816	-35; 70	103.816	0.0941422	-17; 224	0.187
ratio Carn C5/Carn C6-oxo	2 hour OGTT Glucose	-0.433	0.584357	-2; 1.1	-0.004	0.994126	-1.2; 1.2	-1.697	0.100435	-3.7; 0.35	0.151
xLeu	HbA1C	0.156	0.0706497	-0.014; 0.33	0.032	0.777638	-0.2; 0.26	0.224	0.101499	-0.051; 0.5	0.277
Gly	2 hour OGTT Glucose	-0.078	0.114351	-0.18; 0.019	0.004	0.920514	-0.083; 0.091	-0.101	0.102461	-0.22; 0.022	0.161
His	2 hour OGTT Glucose	-0.057	0.726559	-0.38; 0.27	0.058	0.647241	-0.2; 0.31	-0.321	0.104728	-0.72; 0.073	0.107
Carn C5:1	2 hour OGTT Glucose	488.508	0.298865	-448; 1425	-38.977	0.925496	-880; 802	-1120.27	0.10675	-2496; 256	0.179
BCAA sum	HbA1C	0.085	0.0728903	-0.0087; 0.18	0.012	0.843825	-0.11; 0.14	0.131	0.108956	-0.034; 0.3	0.247
ratio Carn C5/Carn C6-oxo	Waist	0.566	0.225916	-0.36; 1.5	-0.033	0.954831	-1.2; 1.1	0.719	0.11698	-0.2; 1.6	0.309
Trp	Waist	0.227	0.111395	-0.056; 0.51	0.063	0.758188	-0.35; 0.47	0.215	0.120725	-0.06; 0.49	0.533
Orn	Homa	-0.013	0.413687	-0.044; 0.018	0.004	0.637639	-0.014; 0.022	-0.052	0.125016	-0.12; 0.015	0.105
Carn C4-OH	2 hour OGTT Glucose	-17.814	0.879823	-254; 218	-19.59	0.784907	-165; 126	-293.388	0.133151	-681; 94	0.184
Met	HbA1C	0.775	0.230458	-0.5; 2	-0.415	0.63693	-2.2; 1.4	1.385	0.134625	-0.42; 3.2	0.154
Carn C0	2 hour OGTT Glucose	-0.456	0.260936	-1.3; 0.35	-0.01	0.975118	-0.63; 0.61	-0.835	0.14611	-2; 0.32	0.205
His	HbA1C	0.241	0.252869	-0.18; 0.66	-0.188	0.585821	-0.89; 0.51	0.358	0.152589	-0.14; 0.85	0.202
Carn C0	Waist	0.118	0.613662	-0.35; 0.59	-0.224	0.4831	-0.87; 0.42	0.347	0.159718	-0.15; 0.85	0.163
Gln	Waist	0.013	0.484966	-0.024; 0.051	-0.01	0.678445	-0.059; 0.039	0.028	0.160159	-0.012; 0.067	0.227
Ser	Homa	-0.01	0.366284	-0.033; 0.012	0.005	0.384257	-0.0071; 0.018	-0.028	0.166617	-0.068; 0.012	0.114
Arg	Waist	0.081	0.334471	-0.086; 0.25	-0.007	0.951037	-0.23; 0.22	0.12	0.169066	-0.056; 0.29	0.369
Gly	HbA1C	-0.073	0.295786	-0.21; 0.068	-0.034	0.780716	-0.29; 0.22	-0.106	0.173564	-0.26; 0.052	0.628
ratio Carn C6-oxo/xLeu	HbA1C	-72175.2	0.488001	-282162; 137811	68798.6	0.583624	-187382; 324980	-203919	0.174459	-506191; 98353	0.167
Orn	HbA1C	-0.297	0.151671	-0.71; 0.12	-0.247	0.38961	-0.83; 0.34	-0.46	0.180334	-1.2; 0.23	0.636
Met	Glucose	0.203	0.0878616	-0.03; 0.44	0.14	0.416268	-0.21; 0.49	0.237	0.180669	-0.11; 0.59	0.692
Pro	2 hour OGTT Glucose	0.009	0.880692	-0.12; 0.13	0.077	0.0794604	-0.01; 0.16	-0.108	0.181173	-0.27; 0.053	0.0446
Carn C5	Glucose	33.971	0.163761	-14; 82	-33.138	0.46174	-124; 58	46.059	0.182961	-23; 115	0.163
ratio Carn C4/Carn C5-oxo	2 hour OGTT Glucose	-1.153	0.600539	-5.5; 3.2	0.405	0.806849	-2.9; 3.8	-4.153	0.187653	-10; 2.1	0.199
Carn C4:1	HbA1C	1369.39	0.407693	-1815; 4554	1017.15	0.612583	-2956; 4991	3687.01	0.195583	-1879; 9253	0.431
Tyr	Glucose	0.048	0.158371	-0.02; 0.12	-0.013	0.831756	-0.13; 0.11	0.061	0.199686	-0.033; 0.15	0.336
Orn	Glucose	-0.103	0.0147485	-0.18; -0.022	-0.122	0.0447984	-0.24; -0.0046	-0.086	0.204783	-0.22; 0.048	0.681
Carn C4-OH	HbA1C	92.29	0.572625	-232; 417	-50.341	0.804252	-464; 364	296.638	0.209727	-166; 759	0.26
Carn C6-oxo	Glucose	-108.809	0.266921	-303; 86	-122.303	0.35465	-389; 144	-185.176	0.210561	-481; 111	0.75
Val	Homa	0.007	0.296604	-0.0064; 0.021	0	0.941474	-0.0076; 0.0082	-0.02	0.217602	-0.052; 0.012	0.217
Arg	Homa	0.003	0.849778	-0.025; 0.031	0.009	0.247719	-0.0064; 0.024	-0.028	0.222468	-0.074; 0.019	0.132
Gly	Homa	-0.003	0.59034	-0.013; 0.0073	0.004	0.214074	-0.0026; 0.011	-0.01	0.222734	-0.025; 0.0062	0.108
Phe	Glucose	0.05	0.435409	-0.078; 0.18	-0.025	0.769995	-0.2; 0.15	0.108	0.232482	-0.075; 0.29	0.293
Carn C4:1	Homa	-32.165	0.768657	-253; 188	-35.391	0.520531	-147; 76	-296.61	0.233499	-802; 208	0.31
Phe	Waist	0.105	0.487312	-0.19; 0.4	-0.08	0.654915	-0.44; 0.28	0.189	0.248051	-0.13; 0.51	0.268
ratio Carn C6-oxo/xLeu	Glucose	-14762.9	0.448796	-53647; 24121	646.022	0.979347	-49935; 51227	-39497.3	0.248835	-108712; 29717	0.346
ratio Carn C5-oxo/Carn C5-OH	HbA1C	6.961	0.126464	-2.2; 16	13.15	0.181483	-6.8; 33	5.725	0.250075	-4.4; 16	0.504
Carn C3	Glucose	9.495	0.201911	-5.1; 24	-3.439	0.80532	-32; 25	10.754	0.252288	-7.9; 29	0.399
Ser	2 hour OGTT Glucose	-0.254	0.0294541	-0.48; -0.026	-0.163	0.0481685	-0.33; -0.00091	-0.204	0.253712	-0.56; 0.15	0.834
His	Waist	0.116	0.221414	-0.072; 0.3	0.085	0.555256	-0.2; 0.37	0.102	0.254027	-0.078; 0.28	0.921
Carn C3-OH	Homa	3.355	0.726305	-16; 22	1.102	0.883739	-14; 16	-17.76	0.258455	-49; 14	0.278
ratio Carn C4:1/Carn C4	Glucose	-7.849	0.792412	-67; 51	42.232	0.251336	-32; 116	-54.07	0.261409	-150; 42	0.112
Gly	Glucose	0.024	0.0593361	-0.0013; 0.049	0.048	0.032569	0.0035; 0.093	0.019	0.262586	-0.015; 0.053	0.291
Carn C4	Waist	20.152	0.308894	-19; 60	-16.916	0.614167	-85; 51	20.334	0.272636	-17; 58	0.335
Carn C0	Glucose	0.145	0.145468	-0.053; 0.34	0.102	0.516011	-0.21; 0.42	0.154	0.279514	-0.14; 0.44	0.805
Arg	2 hour OGTT Glucose	-0.065	0.655803	-0.35; 0.22	-0.06	0.589056	-0.28; 0.16	-0.216	0.280217	-0.62; 0.19	0.494
ratio Carn C6:1-DC/Carn C5:1	2 hour OGTT Glucose	-0.133	0.860591	-1.6; 1.4	0.066	0.891378	-0.9; 1	1.32	0.285225	-1.1; 3.8	0.342
Carn C3:1	2 hour OGTT Glucose	2437.69	0.141443	-849; 5725	608.746	0.665588	-2191; 3409	-2688.19	0.289735	-7780; 2403	0.255
ratio Carn C5-oxo/Carn C5-OH	Waist	-1.27	0.530052	-5.3; 2.8	-2.08	0.574253	-9.6; 5.4	-1.966	0.292832	-5.8; 1.8	0.978
ratio Carn C4/Val	Waist	-1190.01	0.797103	-10427; 8047	-4762.57	0.334822	-14740; 5214	5542.67	0.298262	-5285; 16371	0.161
Carn C2	HbA1C	-0.23	0.905083	-4; 3.5	1.411	0.52862	-3; 5.9	-3.077	0.29998	-8.9; 2.7	0.217
Carn C5:1	HbA1C	1014.11	0.108469	-243; 2272	736.646	0.502141	-1498; 2972	900.025	0.310712	-898; 2699	0.908
xLeu	Waist	0.059	0.108981	-0.014; 0.13	0.019	0.659438	-0.068; 0.11	0.048	0.311062	-0.047; 0.14	0.652
ratio Carn C6-oxo/xLeu	Waist	-44910.5	0.332768	-136888; 47067	-28908.8	0.560105	-129285; 71468	-56764.3	0.316804	-171239; 57710	0.712
Carn C3	2 hour OGTT Glucose	10.845	0.706693	-46; 68	13.867	0.601472	-39; 67	-35.999	0.324593	-109; 37	0.268
ratio Carn C4-OH/Carn C4:1	Glucose	-0.768	0.0291602	-1.5; -0.07	-0.95	0.0321893	-1.8; -0.076	-0.59	0.327369	-1.8; 0.63	0.629
ratio Carn C4/Carn C5-oxo	Homa	-0.067	0.734984	-0.46; 0.33	0.017	0.899077	-0.26; 0.3	-0.344	0.332859	-1.1; 0.38	0.347
Carn C4	2 hour OGTT Glucose	12.745	0.708365	-55; 81	8.395	0.790837	-55; 72	-43.065	0.334694	-133; 47	0.347
ratio Carn C4/Val	2 hour OGTT Glucose	-2674.39	0.731198	-18231; 12883	102.33	0.983384	-9805; 10010	-12472.4	0.339358	-38713; 13768	0.367
ratio Carn C4-OH/Carn C4:1	2 hour OGTT Glucose	0.565	0.698497	-2.3; 3.5	0.487	0.617721	-1.5; 2.4	-2.255	0.356701	-7.2; 2.6	0.296
Ser	Glucose	-0.002	0.937708	-0.062; 0.057	-0.003	0.94572	-0.091; 0.085	0.04	0.368686	-0.047; 0.13	0.487
Carn C5	Homa	7.053	0.438278	-11; 25	-2.537	0.709953	-16; 11	-13.442	0.369031	-43; 17	0.506
BCAA sum	Waist	0.032	0.122312	-0.0089; 0.073	0.01	0.677188	-0.038; 0.057	0.025	0.371286	-0.031; 0.081	0.675
Tyr	Homa	0.025	0.0437612	0.00066; 0.049	0.018	0.0411568	0.00063; 0.036	0.018	0.375264	-0.023; 0.058	0.986
Carn C6-oxo	HbA1C	-136.208	0.803164	-1221; 948	541.929	0.453864	-919; 2002	-619.645	0.376101	-2014; 775	0.248
Carn C6:1-DC	Waist	9.874	0.683277	-38; 58	-6.85	0.783382	-57; 43	27.517	0.377857	-35; 90	0.388
Carn C5-OH	Waist	141.787	0.575073	-359; 643	-150.432	0.668378	-865; 564	232.823	0.378709	-301; 767	0.387
Gln	Homa	0.002	0.574249	-0.0043; 0.0076	0.001	0.407405	-0.0021; 0.0049	-0.005	0.381533	-0.018; 0.007	0.287
Carn C5-OH	2 hour OGTT Glucose	401.931	0.339203	-434; 1238	333.283	0.306058	-316; 982	504.735	0.382699	-655; 1664	0.795
Val	HbA1C	0.123	0.216079	-0.075; 0.32	0.013	0.919329	-0.25; 0.28	0.151	0.383059	-0.2; 0.5	0.526
Thr	HbA1C	0.115	0.399867	-0.16; 0.39	0.098	0.606865	-0.29; 0.49	0.154	0.385354	-0.2; 0.51	0.829
ratio Carn C5/Carn C6-oxo	HbA1C	0.469	0.650007	-1.6; 2.5	-1.362	0.332315	-4.2; 1.5	1.115	0.386799	-1.5; 3.7	0.193
Carn C5:1	Homa	48.204	0.292672	-44; 140	8.821	0.791797	-59; 76	-76.264	0.387582	-255; 103	0.371
Thr	Waist	0.051	0.363358	-0.059; 0.16	0.05	0.498207	-0.099; 0.2	0.054	0.389017	-0.069; 0.18	0.97
ratio Carn C4/Carn C5-oxo	HbA1C	-5.489	0.0726852	-12; 0.55	-9.293	0.0215917	-17; -1.3	-3.567	0.390143	-12; 4.8	0.32
Val	Waist	0.058	0.168659	-0.025; 0.14	0.021	0.669114	-0.08; 0.12	0.051	0.39146	-0.067; 0.17	0.703
Carn C6-oxo	2 hour OGTT Glucose	402.837	0.312016	-386; 1192	-75.062	0.775773	-606; 456	477.369	0.404171	-669; 1624	0.379
Phe	2 hour OGTT Glucose	-0.06	0.815342	-0.57; 0.45	-0.19	0.276648	-0.54; 0.16	-0.296	0.404307	-1; 0.41	0.785
Carn C3:1	Glucose	-608.286	0.160961	-1468; 252	-1159.15	0.0690781	-2424; 105	-570.481	0.406409	-1957; 816	0.528
Ser	Waist	0.049	0.483132	-0.09; 0.19	0.024	0.783272	-0.15; 0.2	0.066	0.407528	-0.094; 0.23	0.721
Carn C3-OH	Glucose	14.892	0.568891	-37; 67	-21.819	0.650878	-119; 76	28.852	0.410031	-41; 99	0.395
Carn C6-OH	Waist	102.767	0.819372	-786; 992	-609.382	0.259283	-1690; 471	414.861	0.410419	-592; 1421	0.164
Carn C3-OH	Waist	33.941	0.569205	-84; 152	0.067	0.999451	-198; 198	48.709	0.413896	-72; 169	0.672
Carn C2	Glucose	-0.494	0.136587	-1.1; 0.15	-0.677	0.155506	-1.6; 0.24	-0.424	0.415339	-1.4; 0.59	0.71
Tyr	2 hour OGTT Glucose	0.08	0.570264	-0.2; 0.36	-0.011	0.927371	-0.25; 0.23	0.147	0.41952	-0.22; 0.51	0.469
Carn C5-oxo	Waist	-27.976	0.700203	-173; 117	-109.583	0.355764	-348; 129	-56.205	0.421076	-198; 86	0.698
Carn C5	HbA1C	-89.426	0.495034	-348; 169	-87.401	0.681204	-518; 343	-134.628	0.424638	-477; 208	0.862
ratio Carn C5/xLeu	2 hour OGTT Glucose	-2741.58	0.906873	-49344; 43860	-8270.7	0.603268	-40113; 23572	-28440.3	0.425224	100000; 43032	0.603
Carn C5:1	Waist	282.298	0.322209	-285; 850	5.916	0.988955	-870; 881	251.029	0.427972	-393; 895	0.649
ratio Carn C6-oxo/xLeu	2 hour OGTT Glucose	19292.4	0.809678	-139848; 178433	-30593.3	0.502377	-122685; 61498	97710.8	0.438864	-156553; 351975	0.34
Carn C6-OH	2 hour OGTT Glucose	189.164	0.807171	-1344; 1722	-736.249	0.128683	-1697; 225	846.924	0.444182	-1362; 3056	0.188
Carn C3:1	Waist	1317.45	0.192708	-681; 3316	611.106	0.660667	-2187; 3409	924.123	0.446313	-1547; 3395	0.866
Carn C0	HbA1C	-0.015	0.980381	-1.2; 1.2	0.153	0.855021	-1.6; 1.9	-0.593	0.449687	-2.2; 0.99	0.517
ratio Carn C6-oxo/xLeu	Homa	1737.88	0.819097	-13498; 16974	-2738.61	0.478352	-10526; 5049	12077.8	0.449874	-20361; 44517	0.371
Carn C6:1-DC	Glucose	1.002	0.922431	-19; 21	-6.168	0.602659	-30; 18	12.927	0.457027	-22; 48	0.367
ratio Carn C5-oxo/Carn C5-OH	Homa	-0.007	0.981714	-0.66; 0.64	-0.211	0.446623	-0.77; 0.35	-0.397	0.458552	-1.5; 0.69	0.759
ratio Carn C4:1/Carn C4	Waist	-18.415	0.787116	-155; 118	49.437	0.524075	-108; 207	-60.863	0.460617	-228; 107	0.334
Pro	HbA1C	0.046	0.612188	-0.13; 0.22	-0.014	0.9132	-0.28; 0.26	0.086	0.462977	-0.14; 0.31	0.565
His	Homa	0.01	0.534892	-0.022; 0.041	0.01	0.335103	-0.011; 0.03	-0.019	0.466834	-0.073; 0.035	0.315
ratio Carn C5:1/Carn C5	Glucose	-5.44	0.64227	-29; 18	8.171	0.645118	-28; 44	-12.859	0.472076	-49; 24	0.41
Val	Glucose	0.003	0.854623	-0.034; 0.041	-0.036	0.126303	-0.084; 0.011	0.024	0.473871	-0.044; 0.093	0.144
Carn C4:1	Waist	-171.321	0.802738	-1536; 1193	-602.594	0.41749	-2122; 916	711.966	0.475197	-1319; 2743	0.298
Carn C2	2 hour OGTT Glucose	-0.704	0.572131	-3.2; 1.8	-1.279	0.112015	-2.9; 0.31	1.37	0.479103	-2.5; 5.3	0.207
Met	Homa	0.026	0.562147	-0.063; 0.12	0.028	0.262643	-0.022; 0.077	-0.057	0.488967	-0.22; 0.11	0.327
ratio Carn C6:1-DC/Carn C5:1	HbA1C	-1.046	0.321166	-3.1; 1	-0.547	0.682198	-3.2; 2.1	-1.088	0.502239	-4.3; 2.1	0.795
Carn C6-oxo	Waist	-56.143	0.810444	-518; 406	-114.62	0.689429	-696; 466	-172.586	0.51033	-701; 355	0.882
BCAA sum	Homa	0.005	0.176156	-0.0021; 0.011	0.001	0.604079	-0.0027; 0.0045	-0.005	0.518609	-0.021; 0.011	0.452
ratio Carn C5/xLeu	Homa	-1268.72	0.563411	-5693; 3156	-1228.07	0.32596	-3728; 1272	-2795.14	0.520829	-11731; 6140	0.733
xLeu	Glucose	0.002	0.915022	-0.031; 0.034	-0.026	0.219554	-0.067; 0.016	0.017	0.521793	-0.037; 0.071	0.209
ratio Carn C5:1/Carn C5	2 hour OGTT Glucose	4.832	0.91665	-87; 97	-3.979	0.901769	-69; 61	-44.456	0.529258	-186; 98	0.602
ratio Carn C5/xLeu	Glucose	4248.36	0.475831	-7570; 16066	2569.49	0.754014	-13912; 19051	5973.67	0.530911	-12951; 24899	0.784
Carn C4	Homa	2.844	0.372955	-3.6; 9.3	-0.623	0.808665	-5.8; 4.6	-3.337	0.535505	-14; 7.7	0.654
Thr	Glucose	0.01	0.697216	-0.039; 0.058	0.002	0.959407	-0.072; 0.076	0.022	0.543049	-0.049; 0.092	0.697
Carn C6-oxo	Homa	36.428	0.309607	-35; 108	-10.209	0.642115	-55; 34	42.64	0.546202	-100; 185	0.477
Carn C5:1	Glucose	86.844	0.496202	-166; 340	-105.62	0.62354	-544; 332	108.165	0.559124	-266; 482	0.455
Carn C5	Waist	39.615	0.488727	-74; 153	-73.825	0.371627	-240; 92	34.661	0.559816	-86; 156	0.288
ratio Carn C5/Carn C6-oxo	Homa	0.024	0.758698	-0.13; 0.17	0.009	0.83469	-0.082; 0.1	-0.08	0.563984	-0.35; 0.19	0.528
BCAA sum	Glucose	0	0.990455	-0.018; 0.018	-0.016	0.170539	-0.039; 0.0073	0.009	0.564503	-0.023; 0.041	0.205
Thr	2 hour OGTT Glucose	-0.015	0.876747	-0.21; 0.18	-0.053	0.437709	-0.19; 0.084	0.074	0.577042	-0.19; 0.34	0.395
Carn C2	Homa	-0.026	0.833796	-0.27; 0.22	-0.086	0.176573	-0.21; 0.042	0.134	0.578797	-0.35; 0.62	0.375
Carn C5	2 hour OGTT Glucose	83.192	0.383794	-106; 272	-21.649	0.790234	-186; 142	-72.356	0.583508	-337; 192	0.743
Gln	Glucose	0.007	0.376216	-0.0087; 0.023	0.007	0.544049	-0.016; 0.03	0.006	0.601536	-0.017; 0.029	0.946
ratio Carn C4-OH/Carn C4:1	HbA1C	0.048	0.981811	-4; 4.1	-1.146	0.658339	-6.4; 4.1	1.526	0.61433	-4.2; 7.2	0.485
BCAA sum	2 hour OGTT Glucose	0.051	0.156817	-0.02; 0.12	0.002	0.914817	-0.042; 0.047	0.03	0.617462	-0.092; 0.15	0.665
Phe	HbA1C	0.071	0.838998	-0.63; 0.77	-0.143	0.756735	-1.1; 0.8	0.237	0.619546	-0.74; 1.2	0.571
Carn C5-oxo	2 hour OGTT Glucose	169.681	0.168883	-76; 415	-2.344	0.983094	-227; 222	81.368	0.619847	-250; 412	0.673
ratio Carn C4:1/Carn C4	2 hour OGTT Glucose	-151.69	0.178731	-376; 73	-85.492	0.239868	-231; 60	-82.766	0.649613	-450; 284	0.989
Gly	Waist	0.023	0.452779	-0.038; 0.083	0.029	0.569924	-0.074; 0.13	0.014	0.65486	-0.049; 0.077	0.799
ratio Carn C6:1-DC/Carn C5:1	Homa	-0.027	0.705894	-0.17; 0.12	-0.061	0.0905359	-0.13; 0.01	0.068	0.657049	-0.24; 0.38	0.414
AAA sum	HbA1C	0.073	0.501251	-0.15; 0.29	-0.028	0.863312	-0.35; 0.3	0.06	0.657558	-0.22; 0.34	0.679
xLeu	2 hour OGTT Glucose	0.078	0.234247	-0.052; 0.21	-0.002	0.964175	-0.084; 0.081	0.046	0.659736	-0.16; 0.26	0.67
Carn C2	Waist	-0.523	0.487604	-2; 0.96	-1.33	0.133306	-3.1; 0.44	0.401	0.661953	-1.4; 2.2	0.173
Ser	HbA1C	-0.034	0.832321	-0.36; 0.29	0.091	0.684089	-0.36; 0.54	-0.098	0.66875	-0.56; 0.36	0.556
ratio Carn C6:1-DC/Carn C5:1	Waist	-0.144	0.755954	-1.1; 0.78	-0.252	0.615813	-1.3; 0.76	-0.247	0.671273	-1.4; 0.93	0.995
Trp	2 hour OGTT Glucose	0.21	0.37716	-0.26; 0.68	-0.072	0.714888	-0.47; 0.33	0.138	0.672965	-0.52; 0.8	0.582
Carn C0	Homa	0.006	0.87571	-0.07; 0.082	0.005	0.840468	-0.046; 0.056	-0.029	0.679772	-0.17; 0.11	0.652
Phe	Homa	0.016	0.518677	-0.032; 0.064	0.009	0.478138	-0.017; 0.035	-0.018	0.693992	-0.11; 0.074	0.566
AAA sum	2 hour OGTT Glucose	0.045	0.563506	-0.11; 0.2	-0.035	0.548733	-0.15; 0.083	0.04	0.700048	-0.17; 0.25	0.528
Trp	HbA1C	0.292	0.409366	-0.41; 0.99	0.194	0.701291	-0.84; 1.2	0.159	0.705214	-0.69; 1	0.957
ratio Carn C6:1-DC/Carn C5:1	Glucose	-0.013	0.946691	-0.39; 0.37	-0.076	0.753361	-0.56; 0.4	0.121	0.706495	-0.54; 0.78	0.625
ratio Carn C4/Val	Homa	-156.291	0.834928	-1657; 1344	-190.664	0.626083	-982; 601	-593.99	0.711896	-3892; 2704	0.81
Tyr	HbA1C	0.148	0.450914	-0.25; 0.55	-0.1	0.763154	-0.77; 0.57	0.089	0.713178	-0.41; 0.58	0.646
Pro	Homa	0.008	0.178222	-0.0036; 0.02	0.002	0.660927	-0.0065; 0.01	0.004	0.719828	-0.017; 0.025	0.86
ratio Carn C4/Carn C5-oxo	Waist	0.458	0.715049	-2; 3	0.414	0.815593	-3.2; 4	0.468	0.726445	-2.2; 3.1	0.981
Carn C6-OH	Homa	28.319	0.691866	-115; 171	-60.944	0.152607	-145; 23	46.112	0.741909	-236; 328	0.464
Carn C4-OH	Glucose	-28.395	0.340776	-88; 31	-63.956	0.0812267	-137; 9.3	16.914	0.756548	-93; 127	0.219
xLeu	Homa	0.009	0.128462	-0.0027; 0.021	0.003	0.340017	-0.0034; 0.0095	-0.004	0.779796	-0.031; 0.023	0.619
AAA sum	Homa	0.012	0.0710606	-0.0011; 0.026	0.007	0.0757551	-0.00082; 0.016	0.003	0.78913	-0.022; 0.029	0.766
Carn C4-OH	Homa	1.471	0.894413	-21; 24	-5.427	0.35872	-17; 6.6	-6.772	0.791742	-59; 46	0.96
ratio Carn C4:1/Carn C4	HbA1C	51.036	0.75606	-276; 378	236.728	0.233595	-161; 635	58.116	0.804198	-415; 531	0.559
ratio Carn C4-OH/Carn C4:1	Waist	-0.385	0.662077	-2.1; 1.4	-0.515	0.593548	-2.5; 1.5	-0.28	0.80535	-2.6; 2.1	0.877
Carn C5-OH	Glucose	75.89	0.494939	-142; 294	-39.081	0.819926	-388; 310	39.566	0.806389	-274; 354	0.735
ratio Carn C5-oxo/Carn C5-OH	Glucose	0.057	0.9472	-1.7; 1.8	-0.291	0.873889	-4; 3.4	0.243	0.817972	-1.9; 2.4	0.8
Trp	Homa	0.03	0.187224	-0.015; 0.074	0.025	0.072415	-0.0024; 0.052	-0.008	0.835893	-0.089; 0.073	0.437
Carn C3:1	HbA1C	-704.4	0.767657	-5506; 4098	-3264.1	0.350861	-10303; 3775	658.619	0.844127	-6164; 7481	0.42
ratio Carn C5-OH/Carn C5:1	Waist	-2.2	0.521435	-9; 4.6	-1.712	0.714439	-11; 7.8	-0.762	0.848405	-8.9; 7.4	0.879
His	Glucose	-0.019	0.653763	-0.1; 0.062	-0.089	0.183136	-0.22; 0.04	0.01	0.851232	-0.1; 0.12	0.242
Carn C6:1-DC	Homa	-0.26	0.944154	-7.7; 7.2	-2.606	0.173555	-6.4; 1.2	-1.692	0.852258	-20; 17	0.922
ratio Carn C4/Val	HbA1C	-11787.6	0.267237	-32711; 9135	-17068.4	0.17377	-42180; 8044	-2863.38	0.85496	-34761; 29034	0.48
Carn C5-oxo	Homa	9.928	0.359111	-12; 32	-6.078	0.479665	-24; 11	-3.389	0.861106	-43; 36	0.9
Carn C5-oxo	HbA1C	124.685	0.471447	-226; 476	203.136	0.533571	-459; 866	33.262	0.863288	-363; 429	0.657
ratio Carn C5:1/Carn C5	Homa	-0.288	0.948163	-9.2; 8.7	0.253	0.922474	-5; 5.5	-1.415	0.864642	-19; 16	0.851
Thr	Homa	0.006	0.54789	-0.013; 0.024	0.006	0.236469	-0.0043; 0.017	0.003	0.867879	-0.032; 0.038	0.853
Carn C5-oxo	Glucose	2.177	0.943676	-59; 64	-44.502	0.435191	-159; 70	6.115	0.877348	-75; 87	0.467
Carn C3	Homa	3.886	0.163633	-1.5; 9.3	-1.645	0.461104	-6.1; 2.8	0.657	0.885445	-8.5; 9.8	0.649
Carn C3	HbA1C	-2.624	0.948816	-84; 78	-6.525	0.929299	-155; 142	-6.418	0.891799	-103; 90	0.999
Carn C4	HbA1C	15.422	0.74324	-79; 109	-105.275	0.203832	-271; 60	7.365	0.892783	-104; 119	0.256
Gln	HbA1C	0.048	0.255929	-0.035; 0.13	0.063	0.300207	-0.06; 0.19	0.008	0.895688	-0.12; 0.13	0.527
Carn C6:1-DC	HbA1C	-7.539	0.890871	-118; 103	9.227	0.888491	-124; 143	-10.711	0.902976	-189; 167	0.856
ratio Carn C5-oxo/Carn C5-OH	2 hour OGTT Glucose	1.749	0.614874	-5.2; 8.7	-2.937	0.389605	-9.8; 3.9	-0.453	0.916797	-9.2; 8.3	0.651
ratio Carn C5/xLeu	Waist	-11201.9	0.399051	-37554; 15151	-22479.9	0.15337	-53959; 8999	-1211.36	0.94266	-35482; 33059	0.358
ratio Carn C4:1/Carn C4	Homa	-5.198	0.637908	-28; 17	3.446	0.560948	-8.5; 15	1.341	0.954	-46; 49	0.931
Carn C6-OH	Glucose	139.054	0.479908	-249; 527	35.769	0.895002	-513; 585	17.645	0.954009	-581; 616	0.964
Carn C4-OH	Waist	-33.836	0.630812	-174; 107	-68.169	0.368764	-223; 87	4.929	0.958155	-188; 198	0.551
ratio Carn C4-OH/Carn C4:1	Homa	0.018	0.896826	-0.26; 0.29	-0.055	0.430805	-0.2; 0.087	0.015	0.96094	-0.61; 0.64	0.825
Carn C6:1-DC	2 hour OGTT Glucose	13.454	0.729029	-64; 91	5.587	0.815436	-43; 54	-2.802	0.967791	-143; 137	0.909
Orn	Waist	0.037	0.711567	-0.16; 0.24	-0.022	0.863244	-0.27; 0.22	0.004	0.971609	-0.25; 0.26	0.881
Val	2 hour OGTT Glucose	0.096	0.194285	-0.051; 0.24	0.012	0.790453	-0.079; 0.1	-0.003	0.979779	-0.26; 0.26	0.911
Carn C3:1	Homa	227.514	0.163887	-93; 548	104.476	0.27364	-87; 296	-7.982	0.981061	-672; 656	0.743
ratio Carn C5:1/Carn C5	Waist	6.664	0.807165	-48; 61	29.626	0.369194	-37; 96	0.439	0.988756	-64; 65	0.524
ratio Carn C5-OH/Carn C5:1	Glucose	0.344	0.821247	-2.7; 3.4	0.984	0.671787	-3.8; 5.7	0.029	0.98986	-4.6; 4.6	0.771
